# Supplementary material for: Access to novel imidazo[1,5-a]pyrazine scaffolds by the combined use of a three-component reaction and a base-assisted intramolecular cyclization
Source: Royal Society of Chemistry journal article supplement (doi:10.1039/c4ob00676c), 2014-01-01

# Access to Novel Imidazo[1,5-*a*]pyrazine Scaffolds by the Combined Use of a Three-Component Reaction and a Base-Assisted Intramolecular Cyclization

Orazio A. Attanasi,<sup>‡</sup> Gianfranco Favi,<sup>\*‡</sup> Gianluca Giorgi,<sup>†</sup> Roberta Majer,<sup>‡</sup> Francesca Romana Perrulli<sup>\*‡</sup> and Stefania Santeusano<sup>‡</sup>

<sup>‡</sup>*Dipartimento di Scienze Biomolecolari, Sezione COSON, Università degli Studi di Urbino “Carlo Bo”, Via I Maggetti 24, 61029 Urbino, Italy and* <sup>†</sup>*Dipartimento di Chimica, Università degli Studi di Siena, Via Aldo Moro, 53100 Siena, Italy*

*e-mail: gianfranco.favi@uniurb.it*

## SUPPORTING INFORMATION

1. Copies of <sup>1</sup>H and <sup>13</sup>C NMR spectra of products S2-S25

1.  $^1\text{H}$  and  $^{13}\text{C}$  NMR spectra of products.

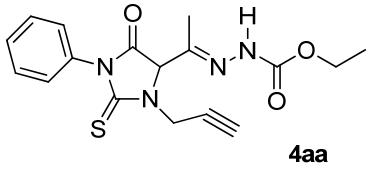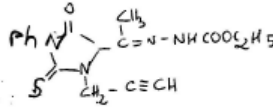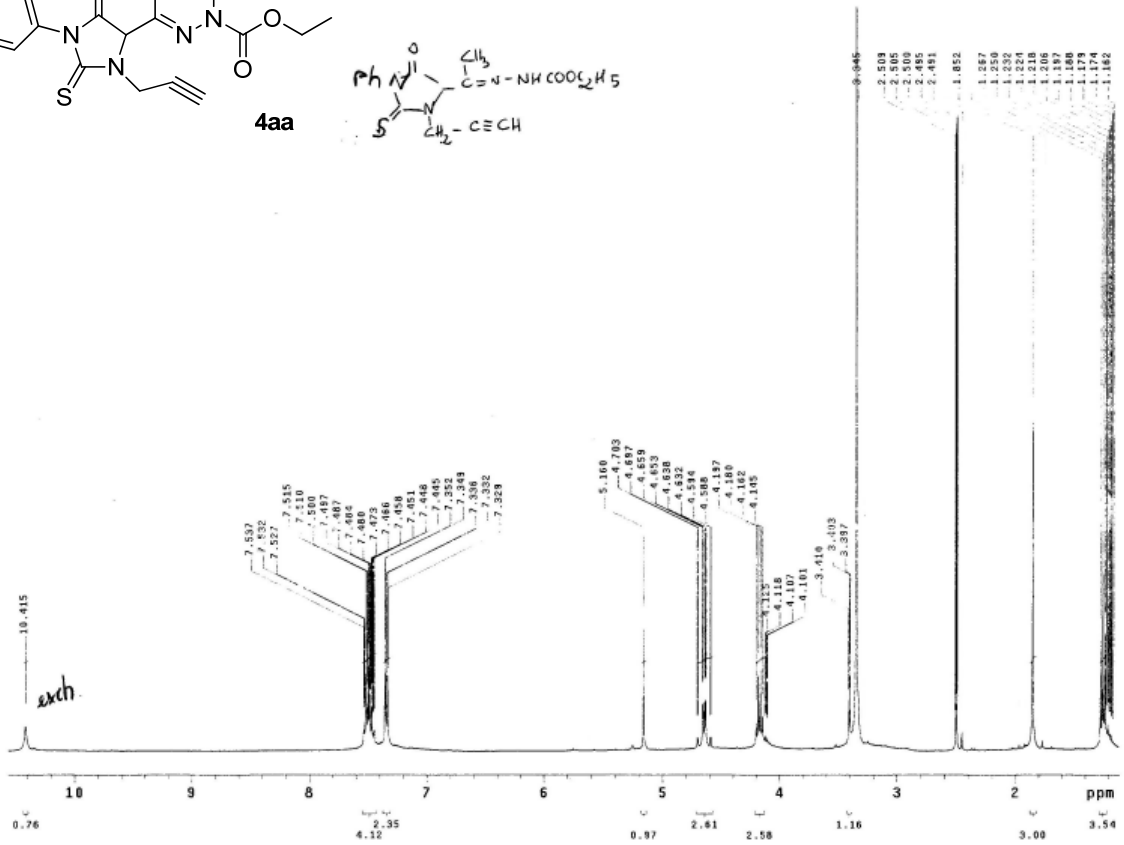

4aa

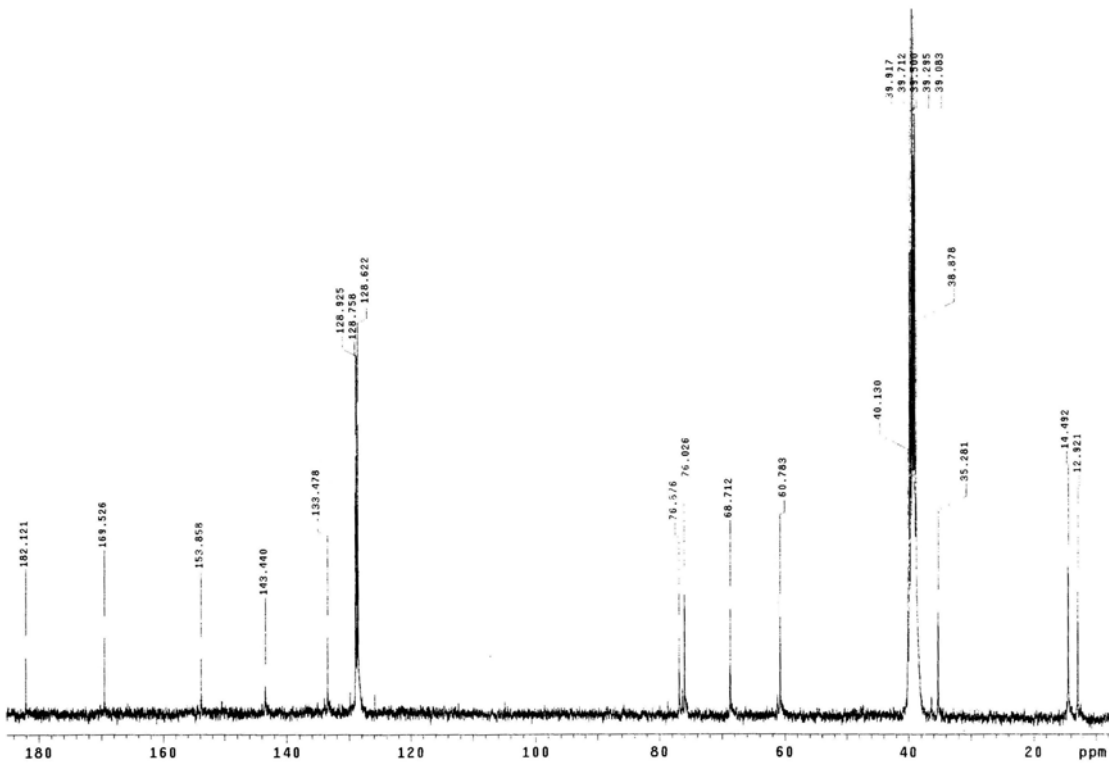

4aa

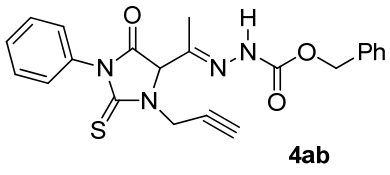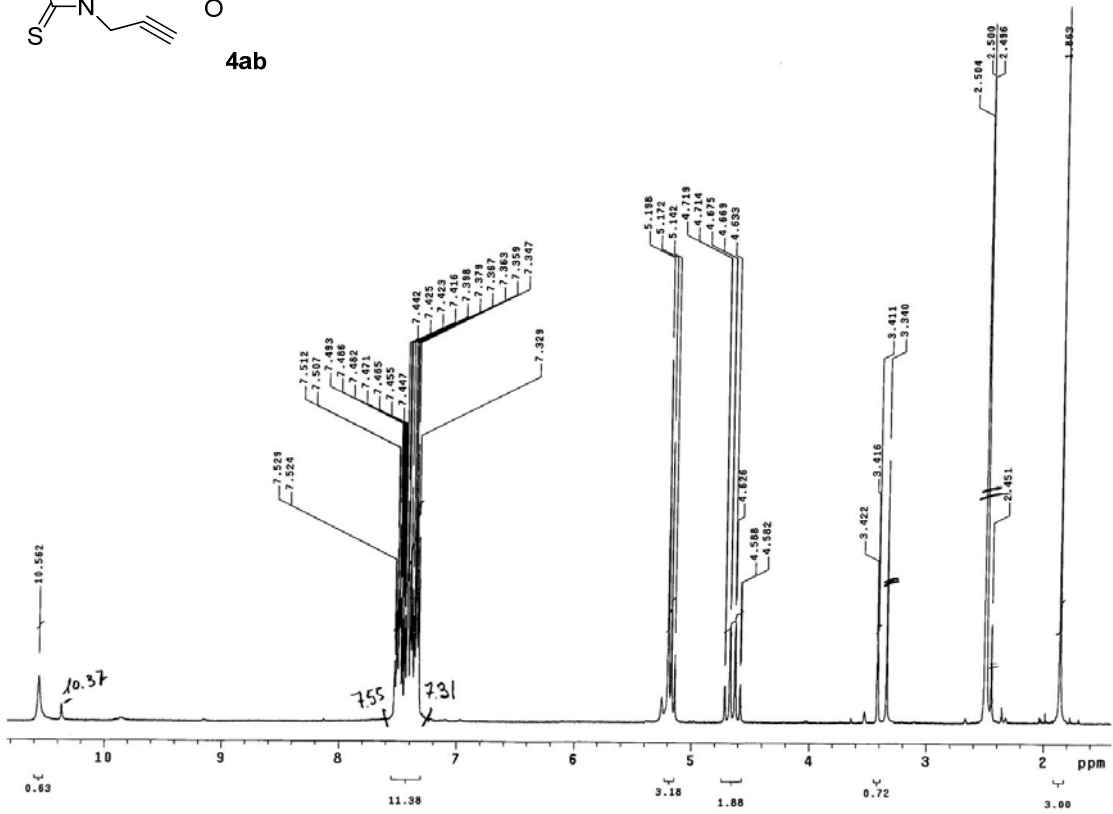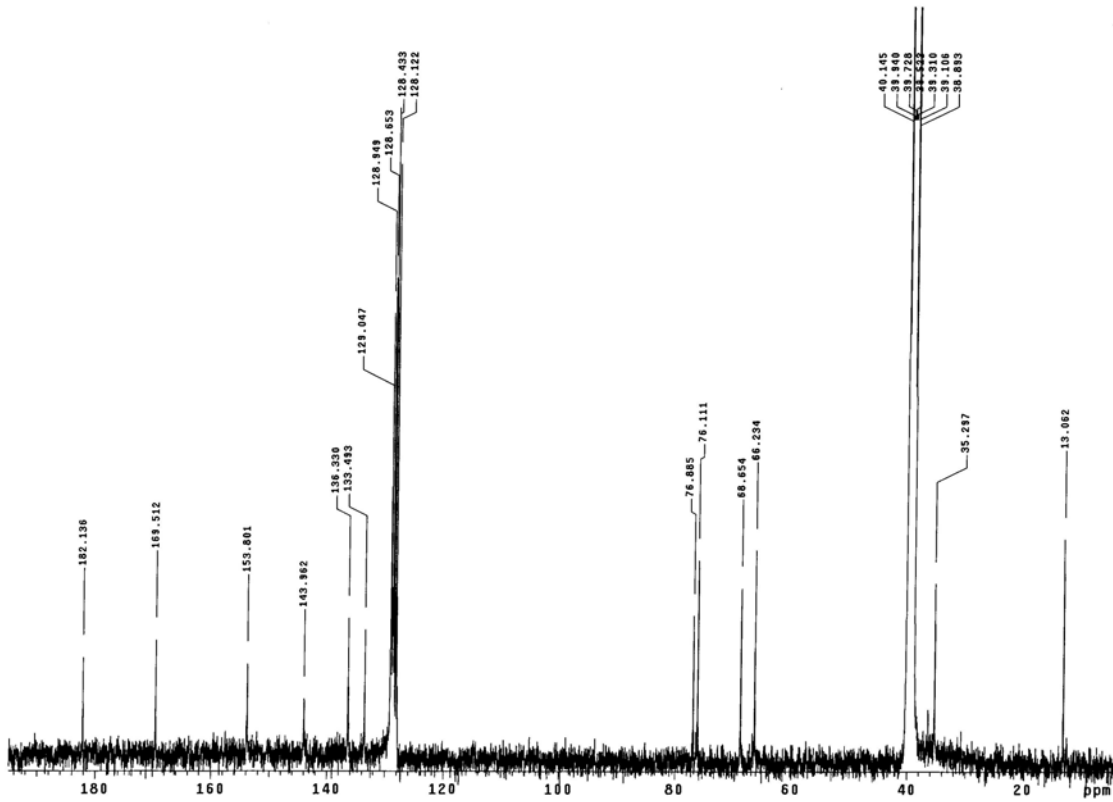

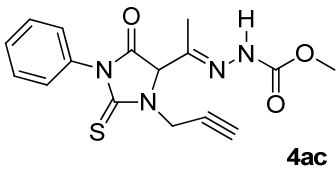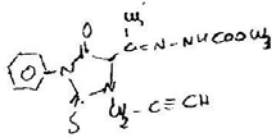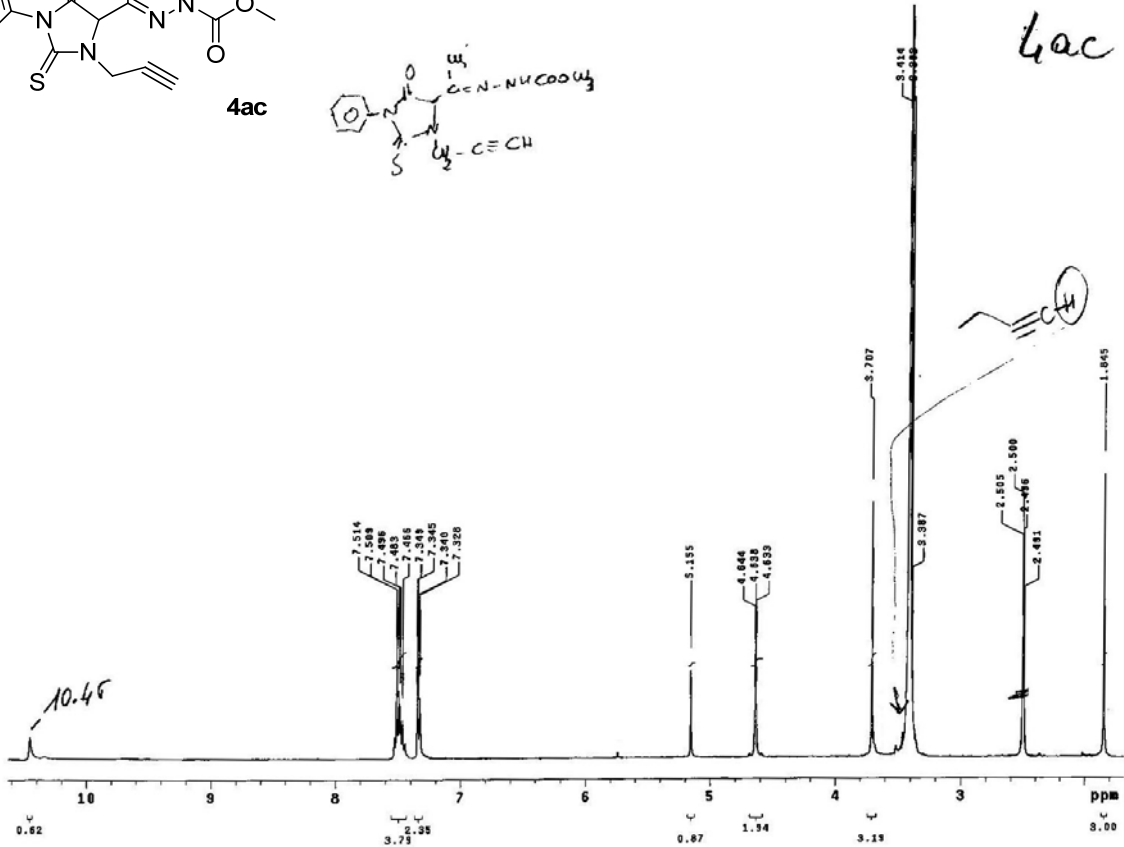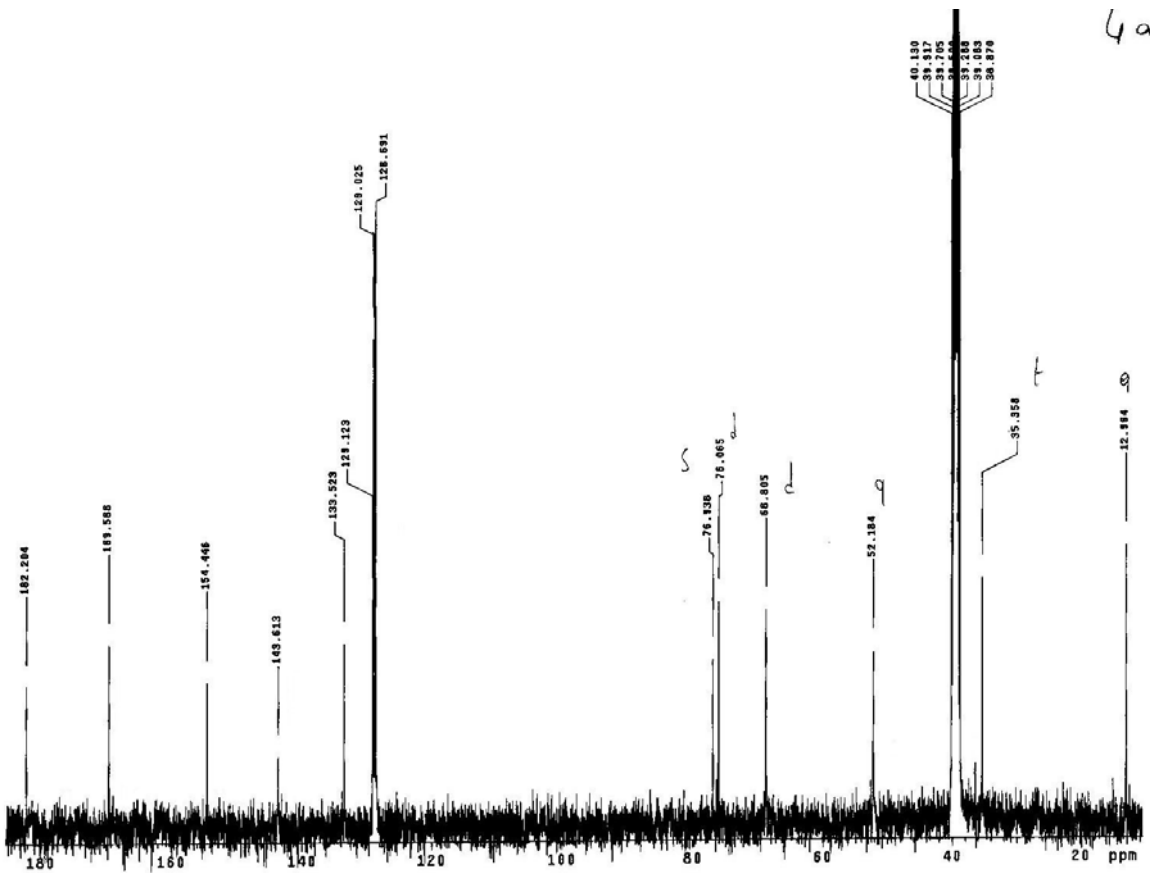

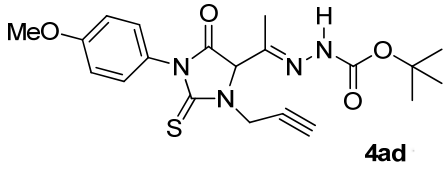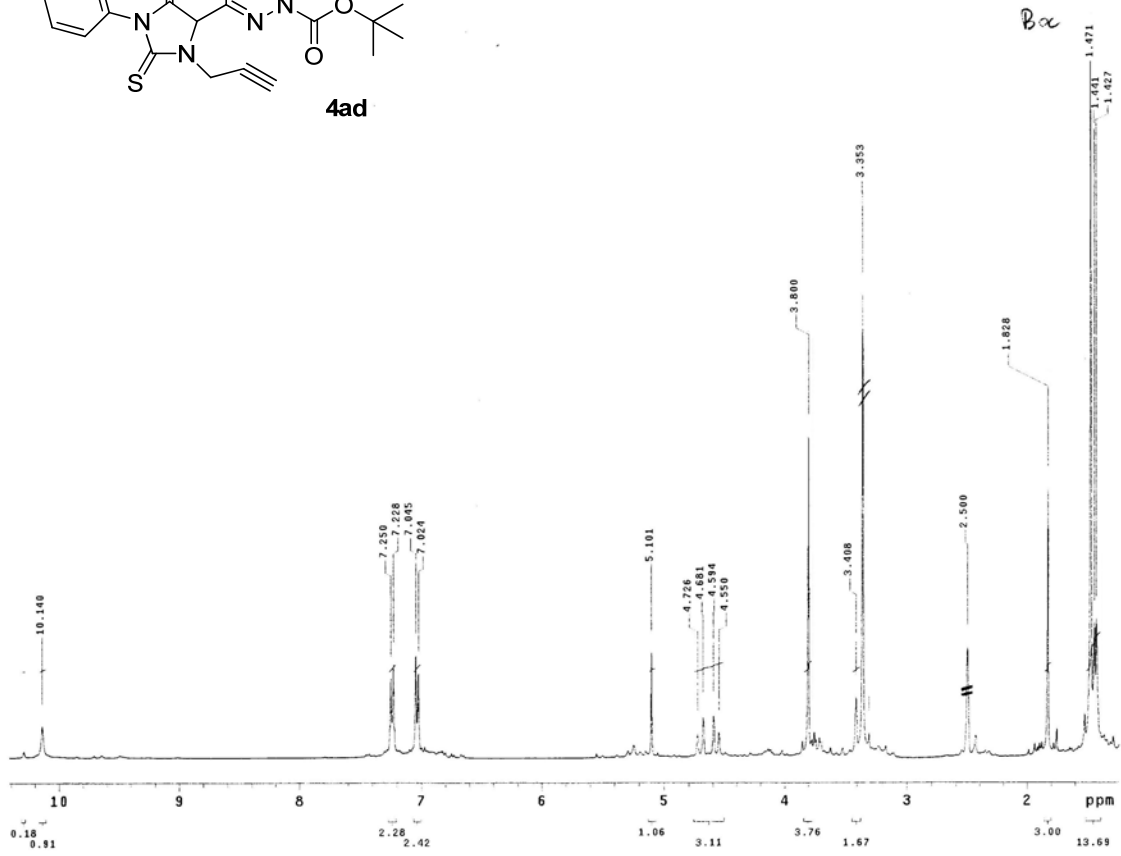

Ba 4ad

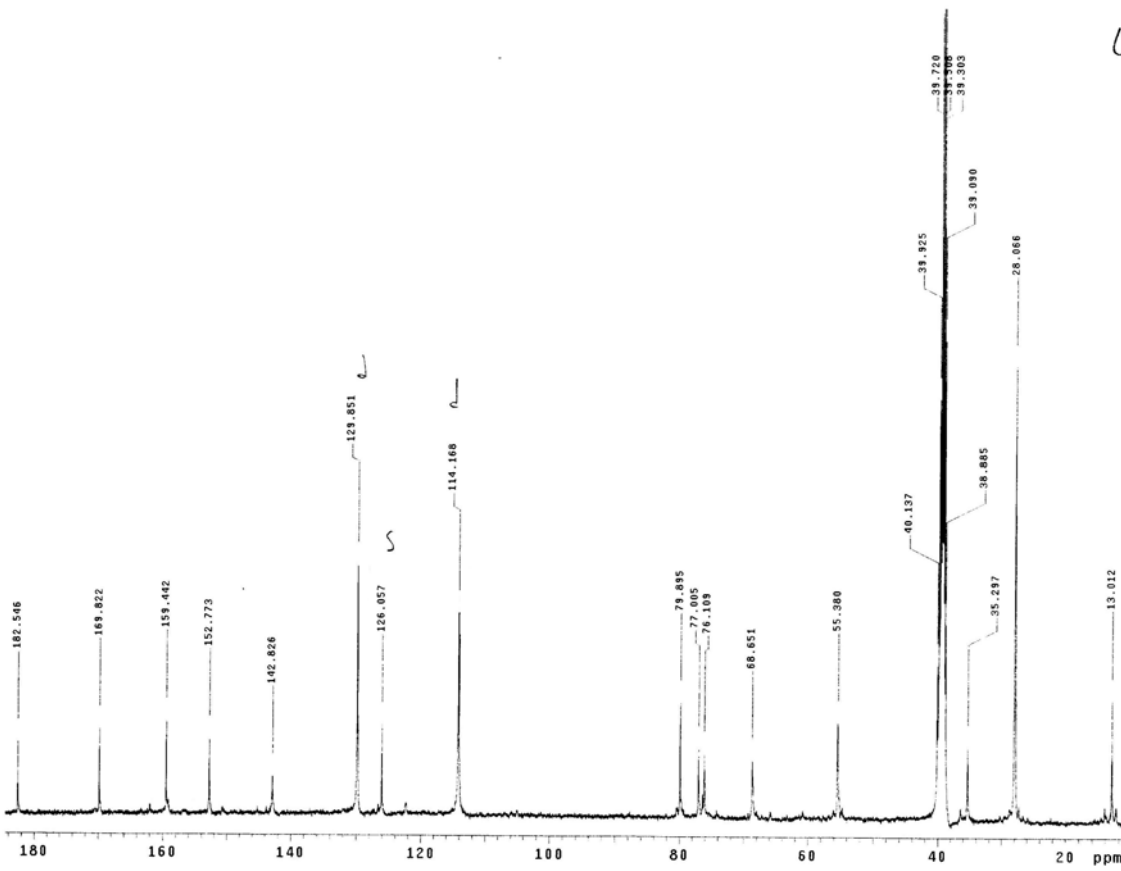

4ad

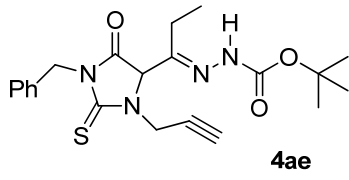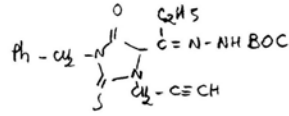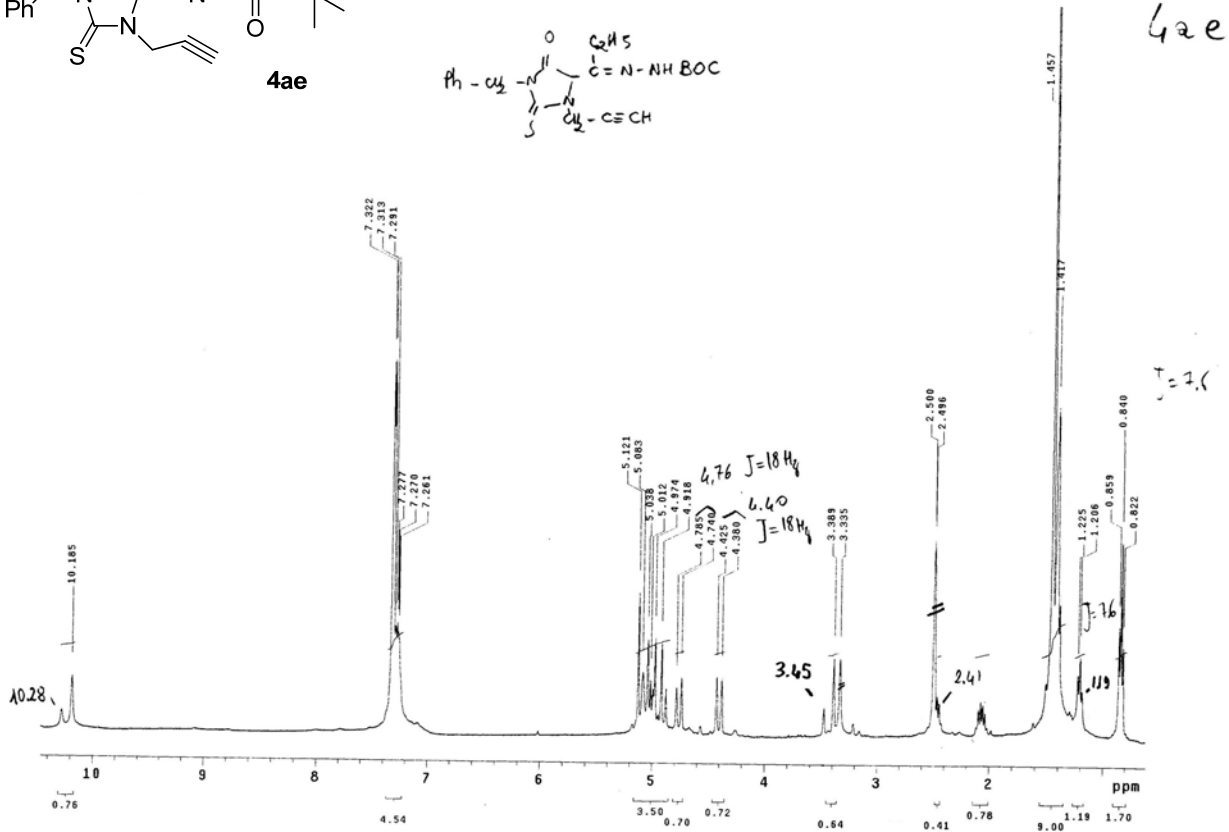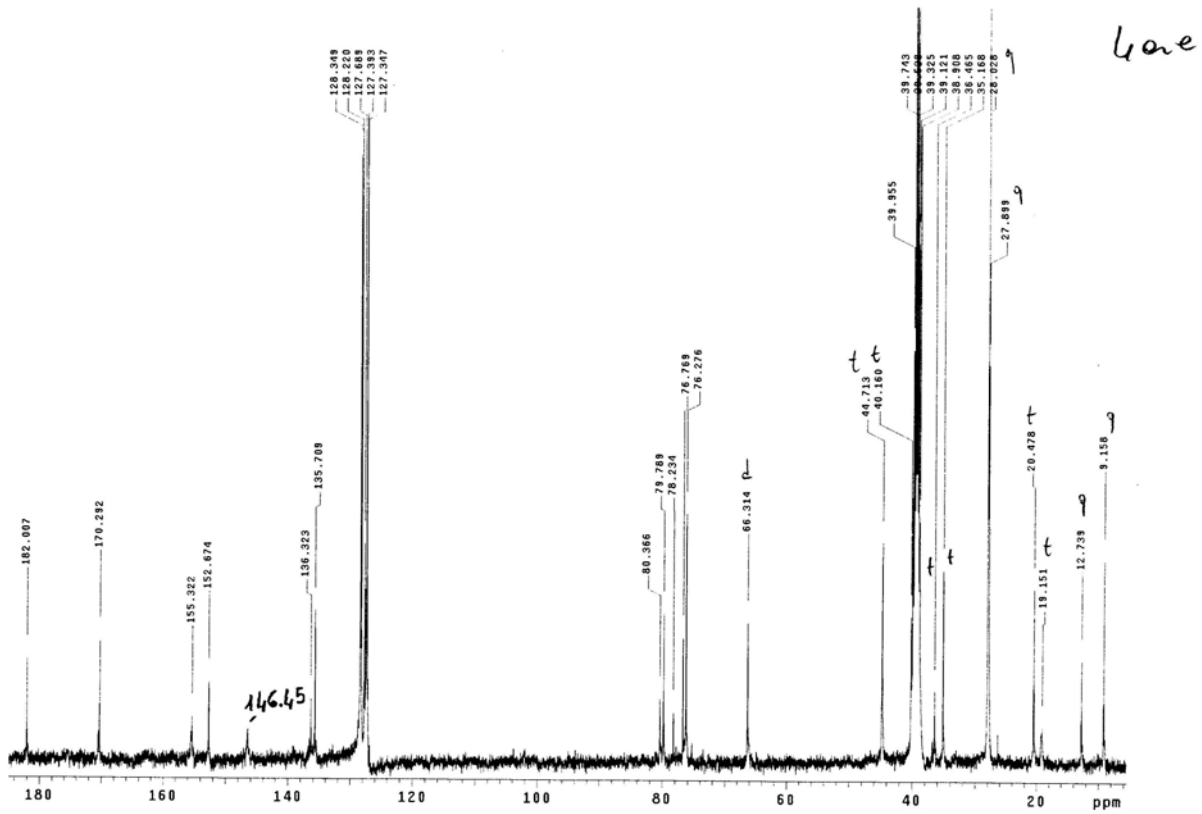

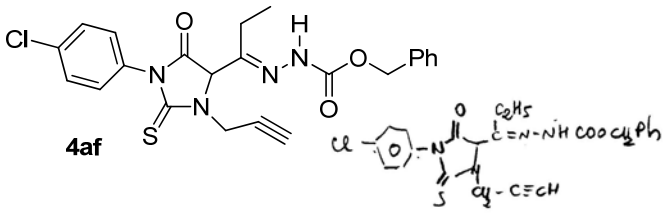

laf

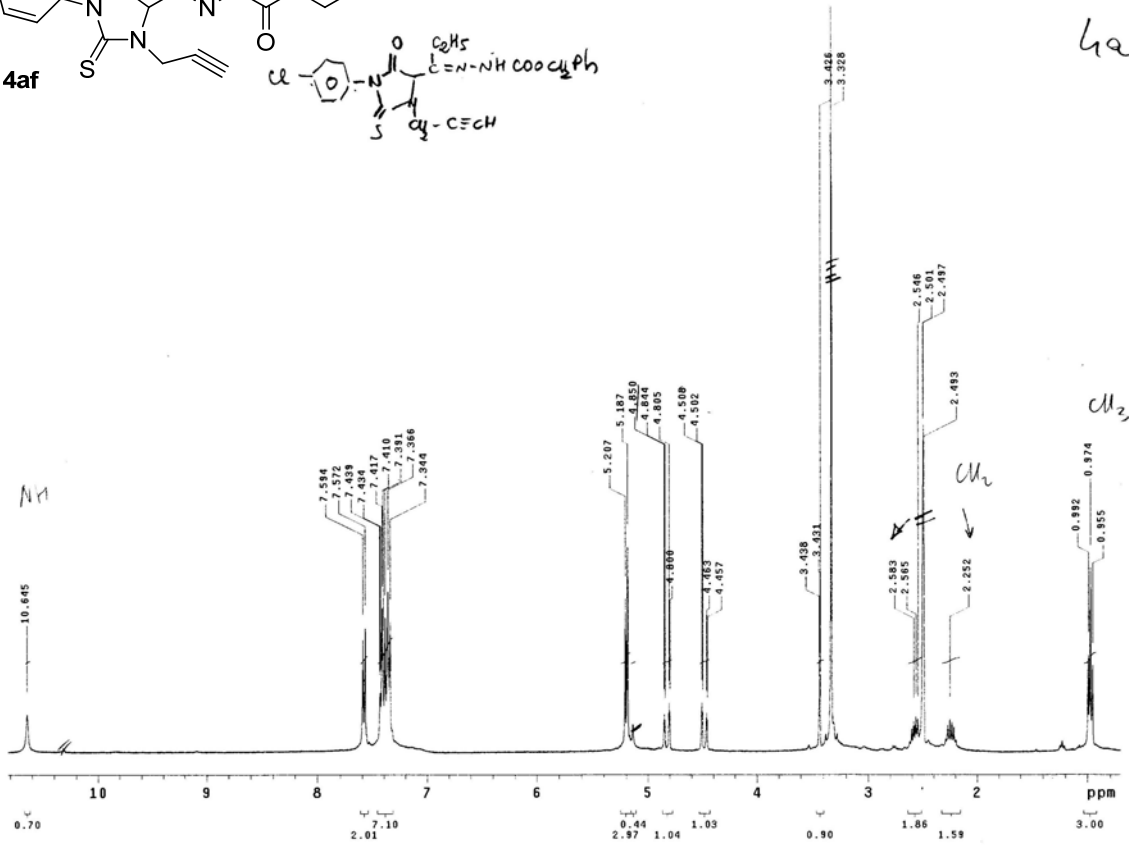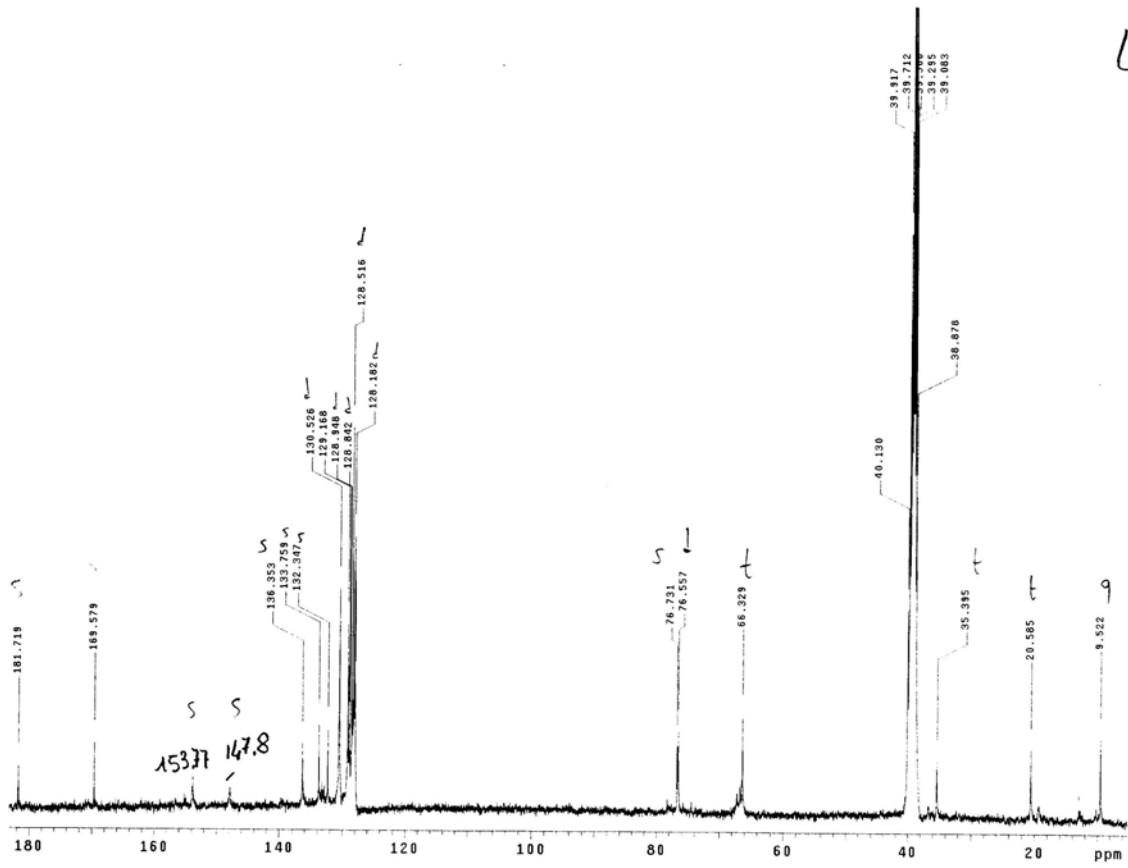

laf

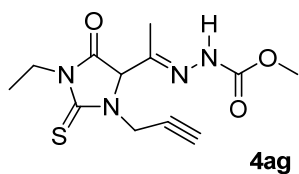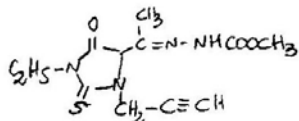

4a9

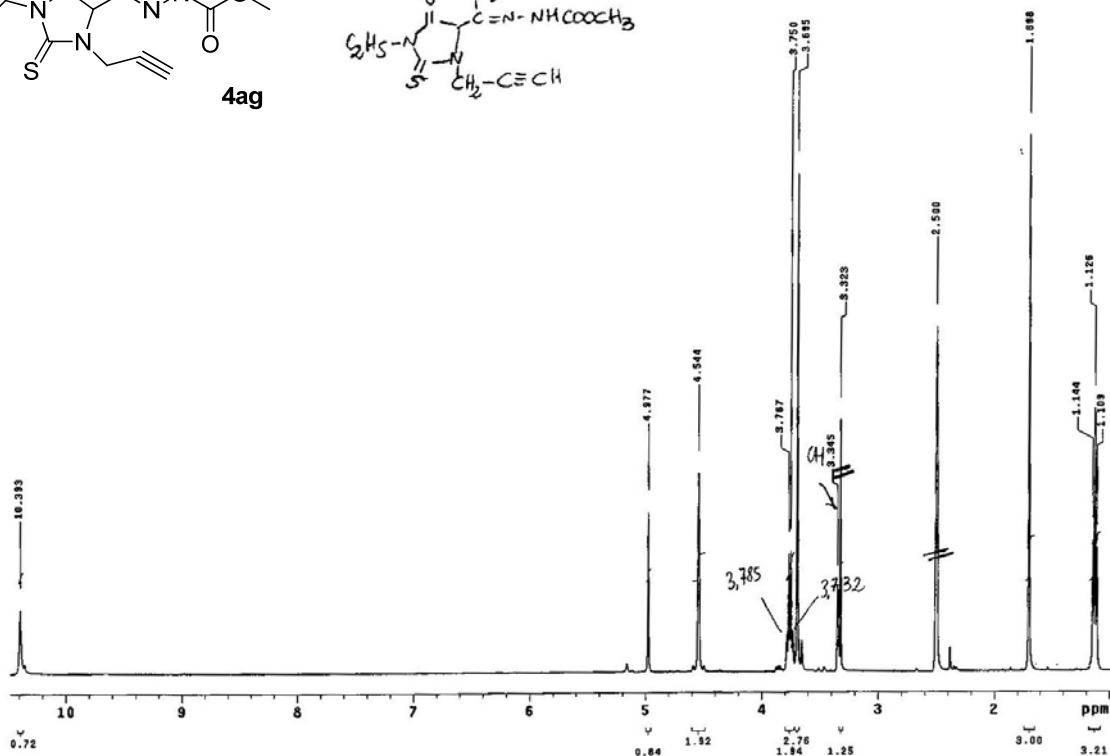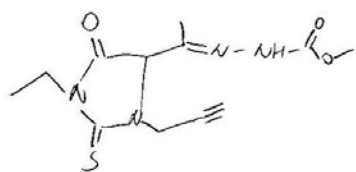

4a9

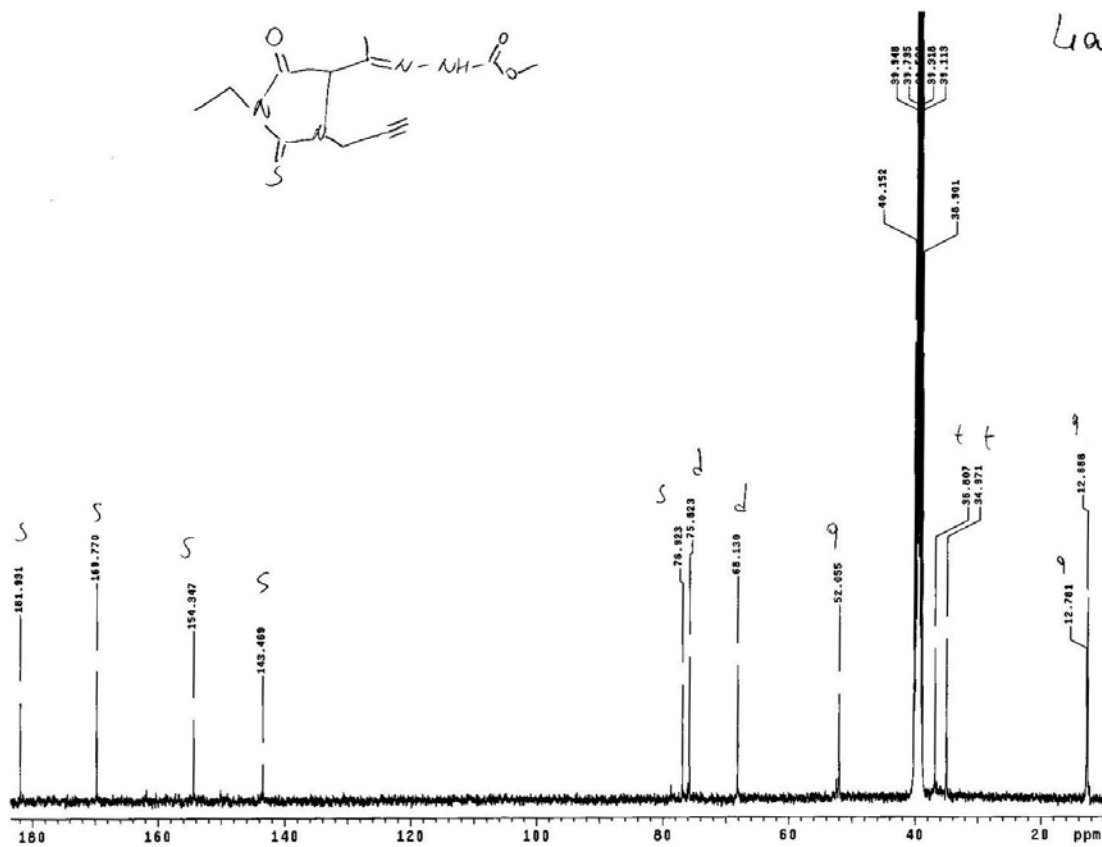



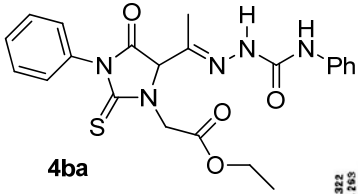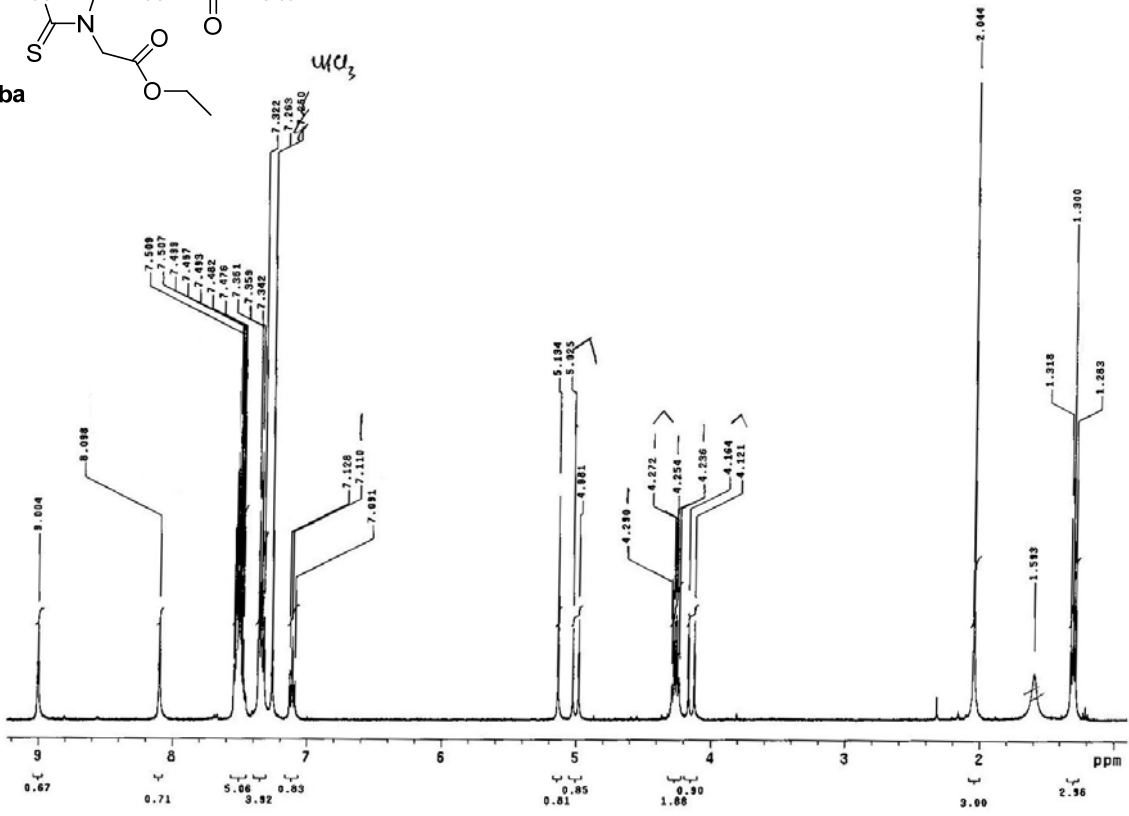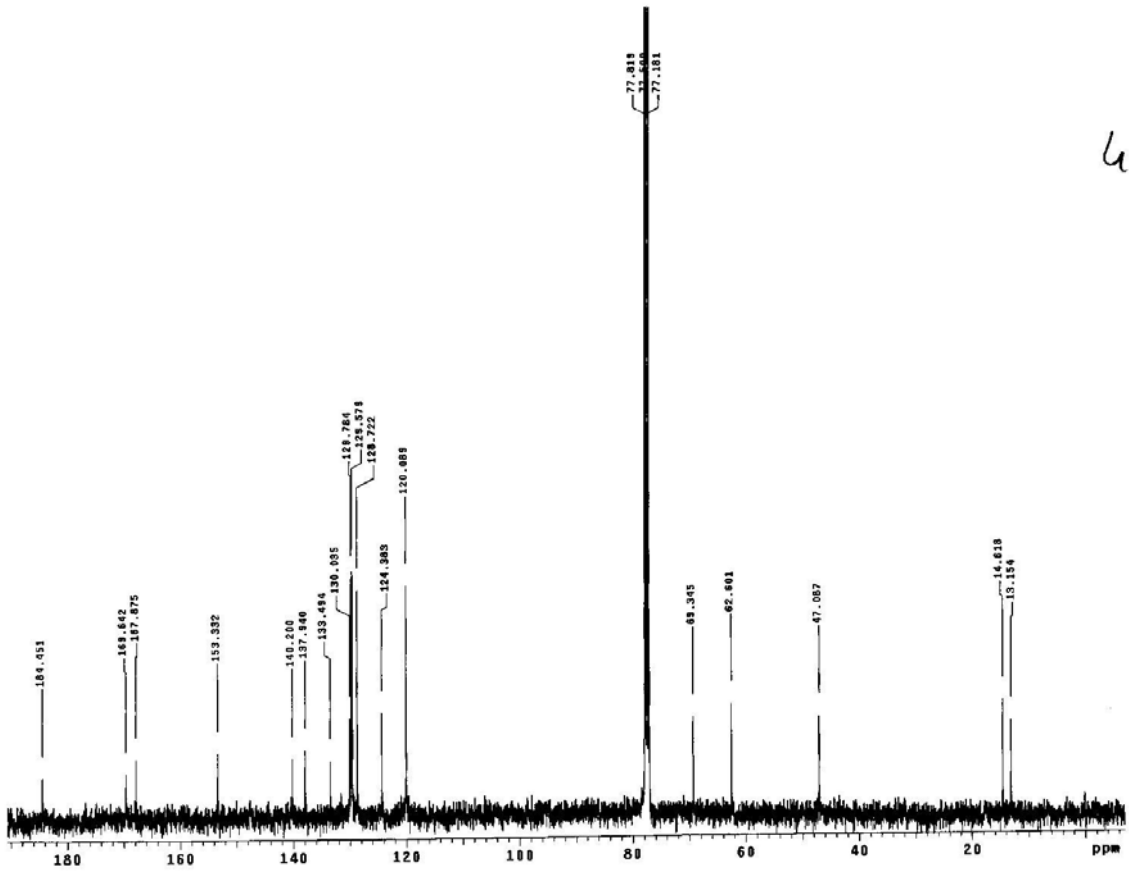

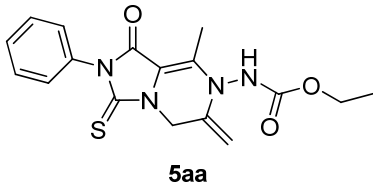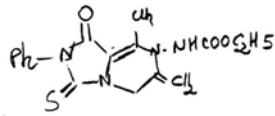

5aa

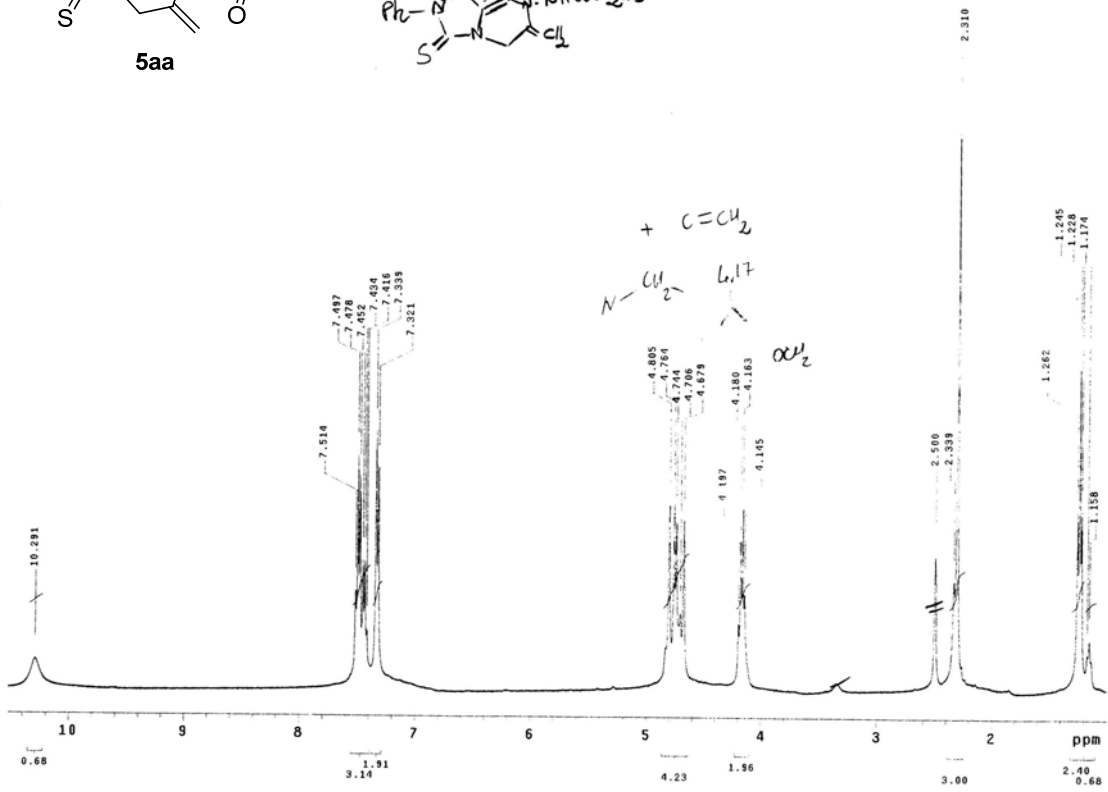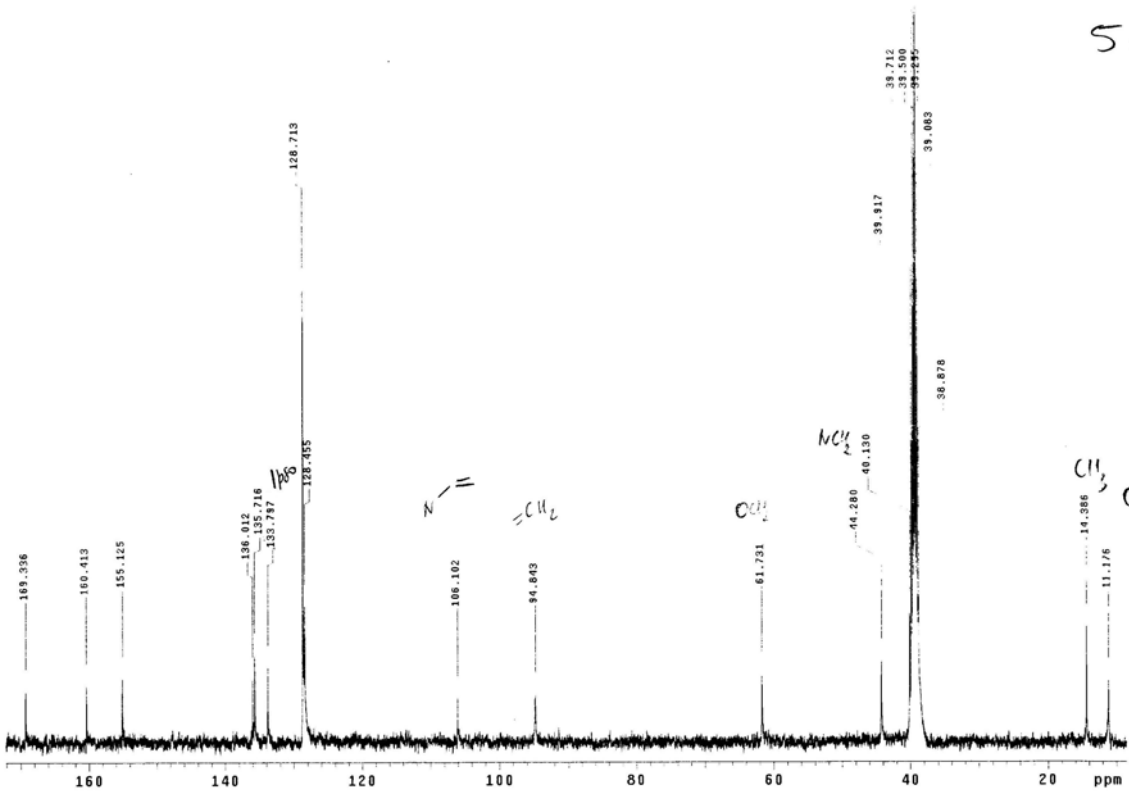

5aa

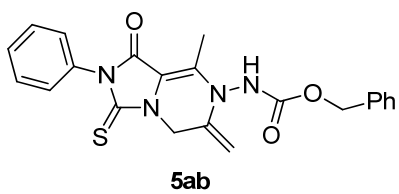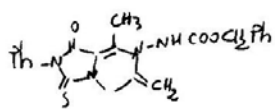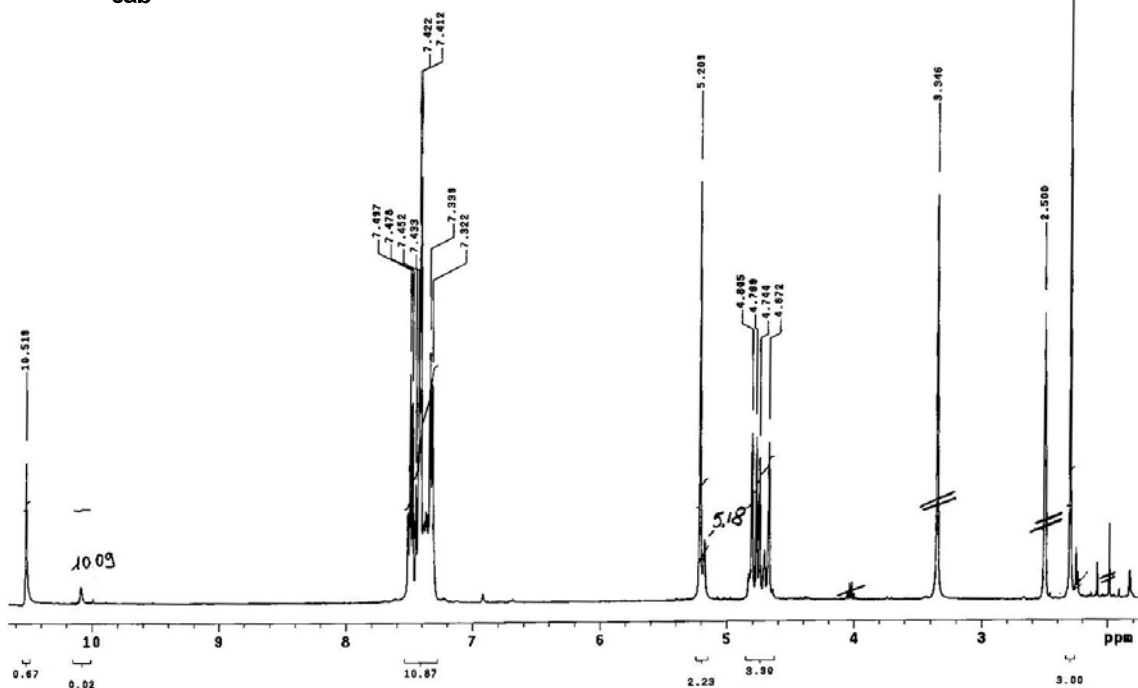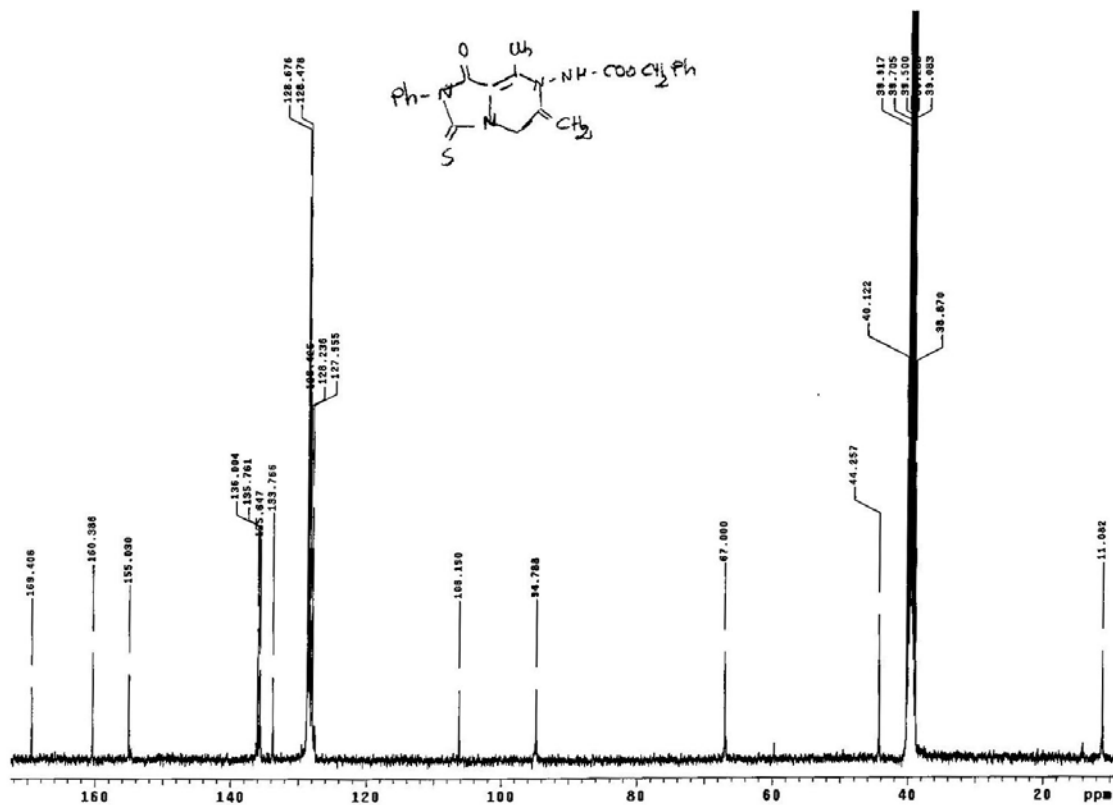

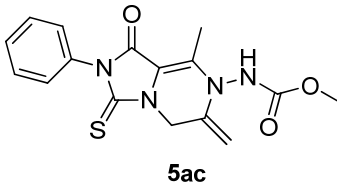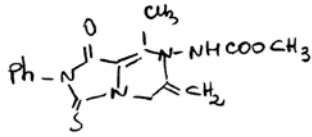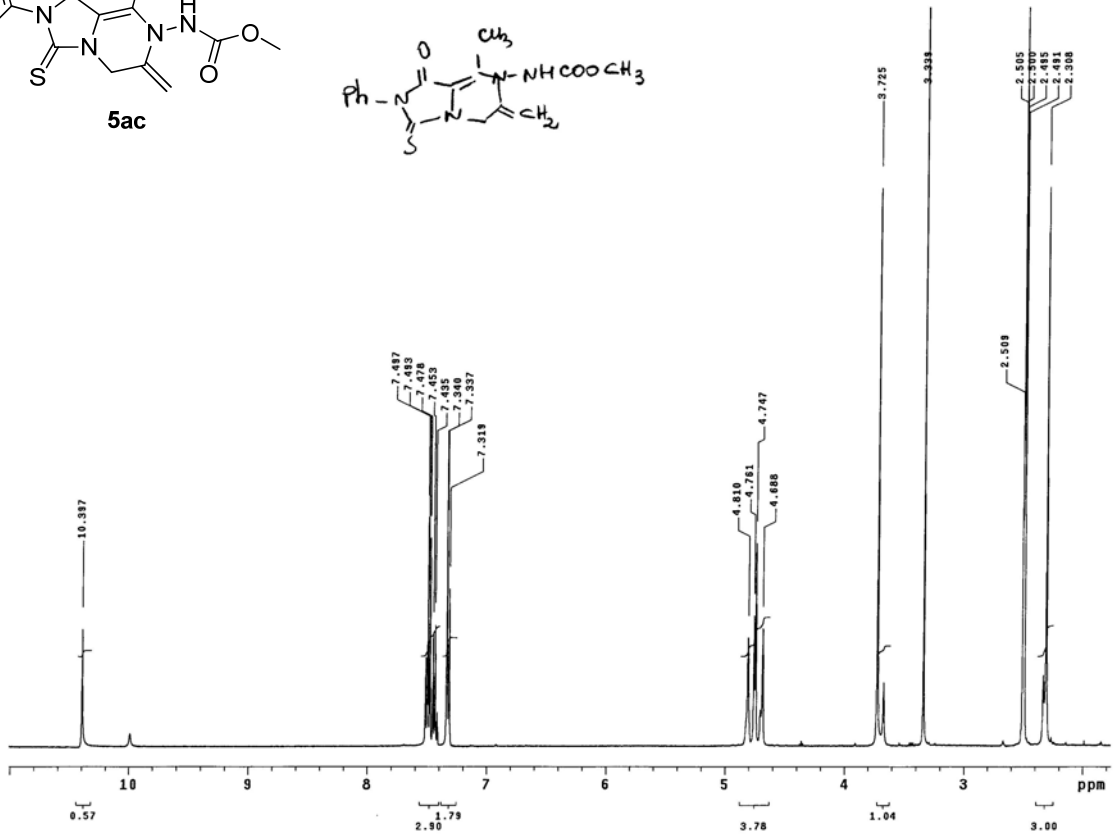

5ac

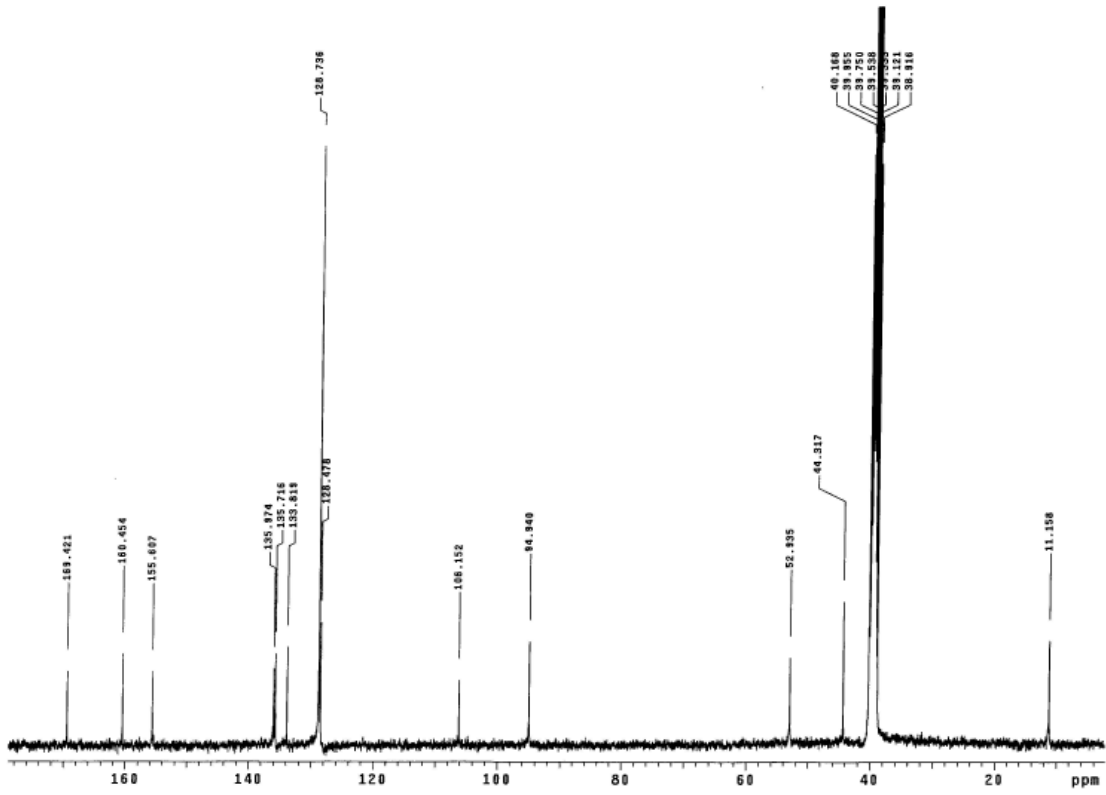

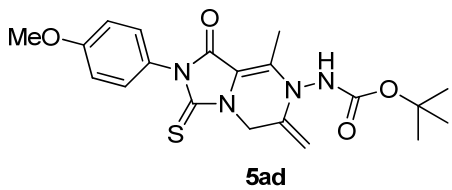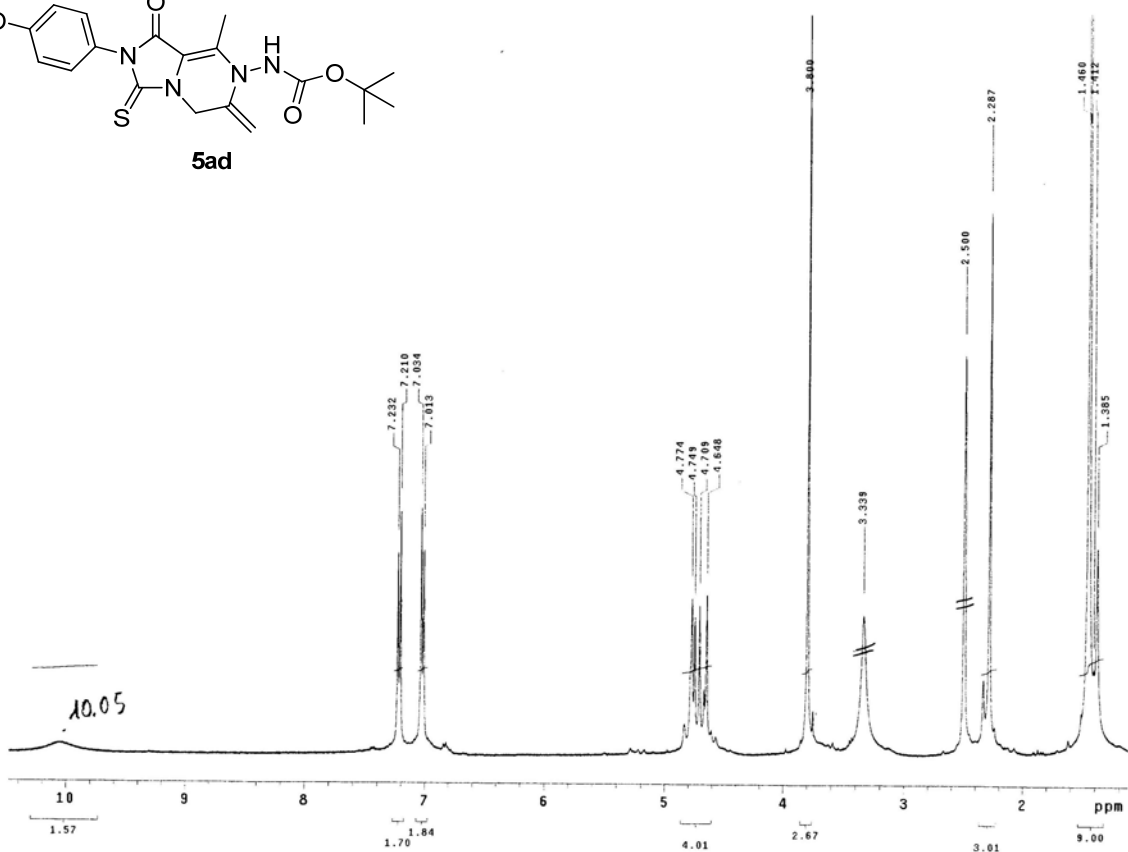

5ad

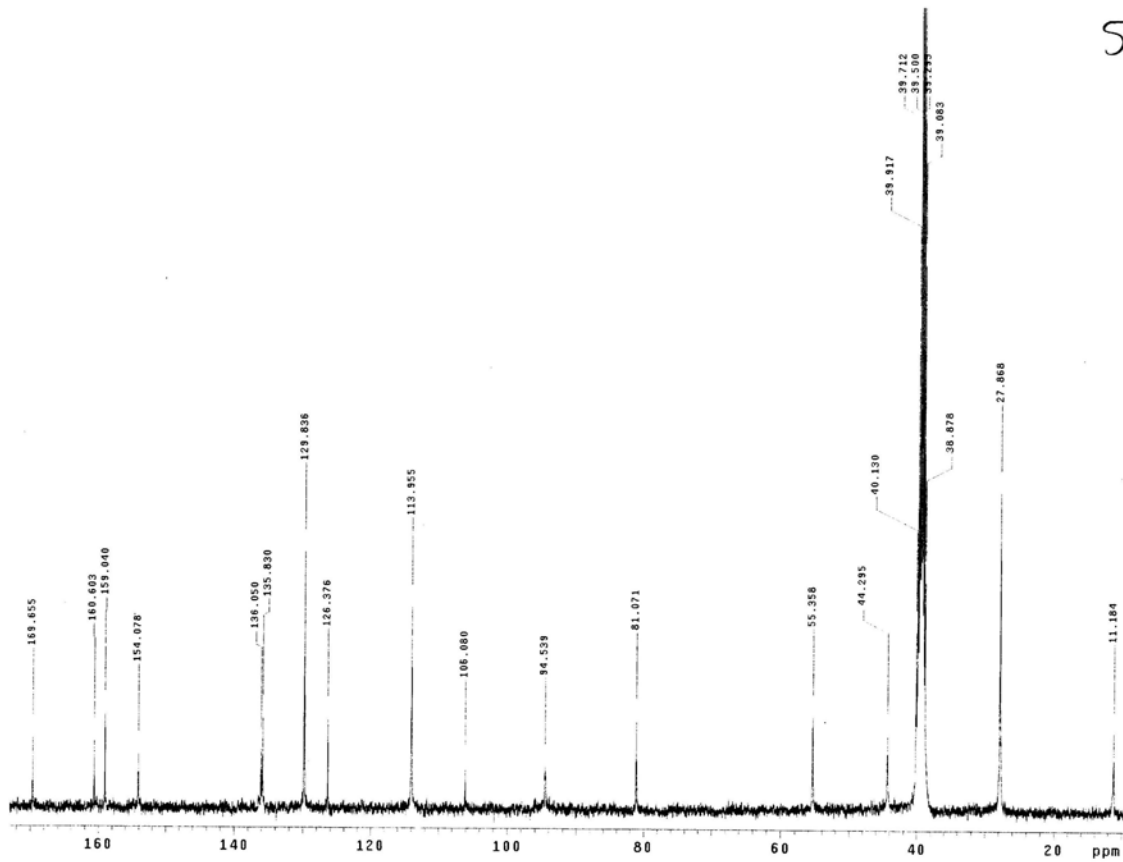

5ad

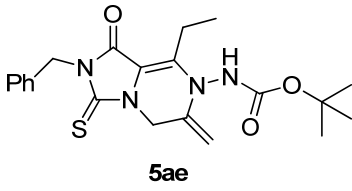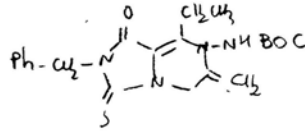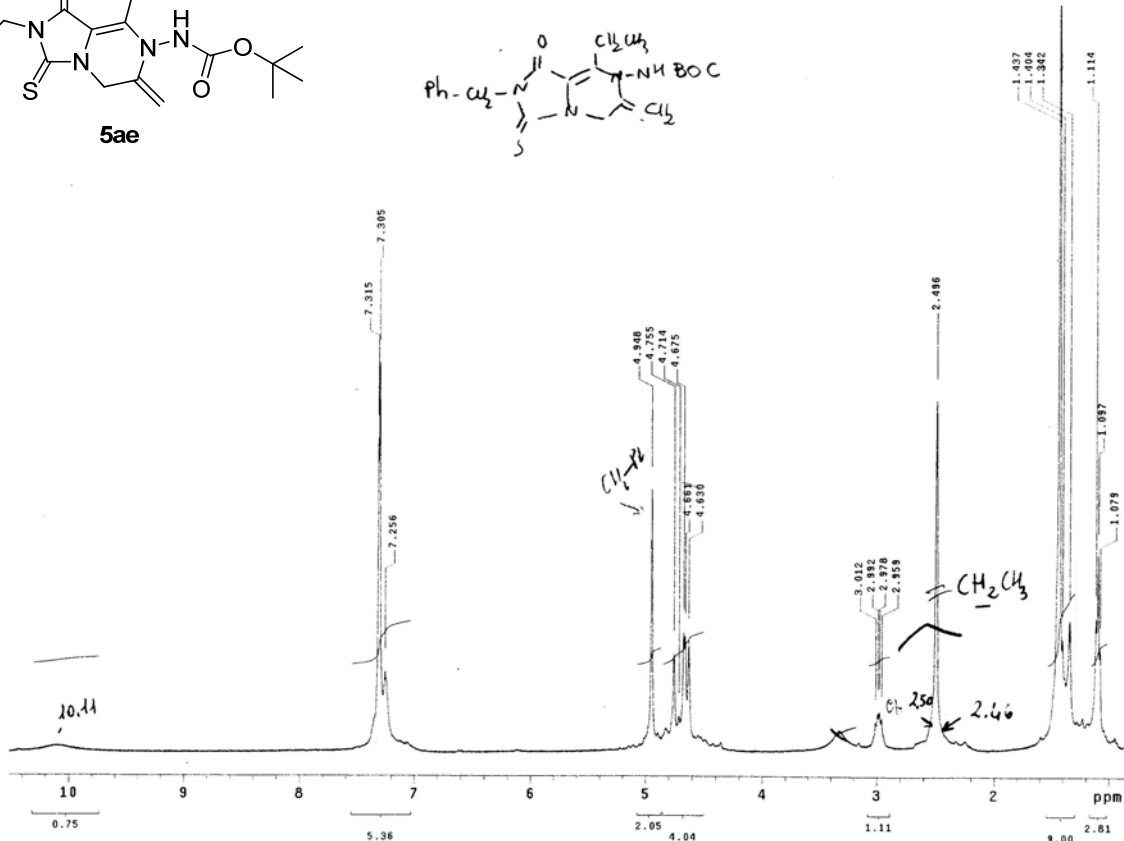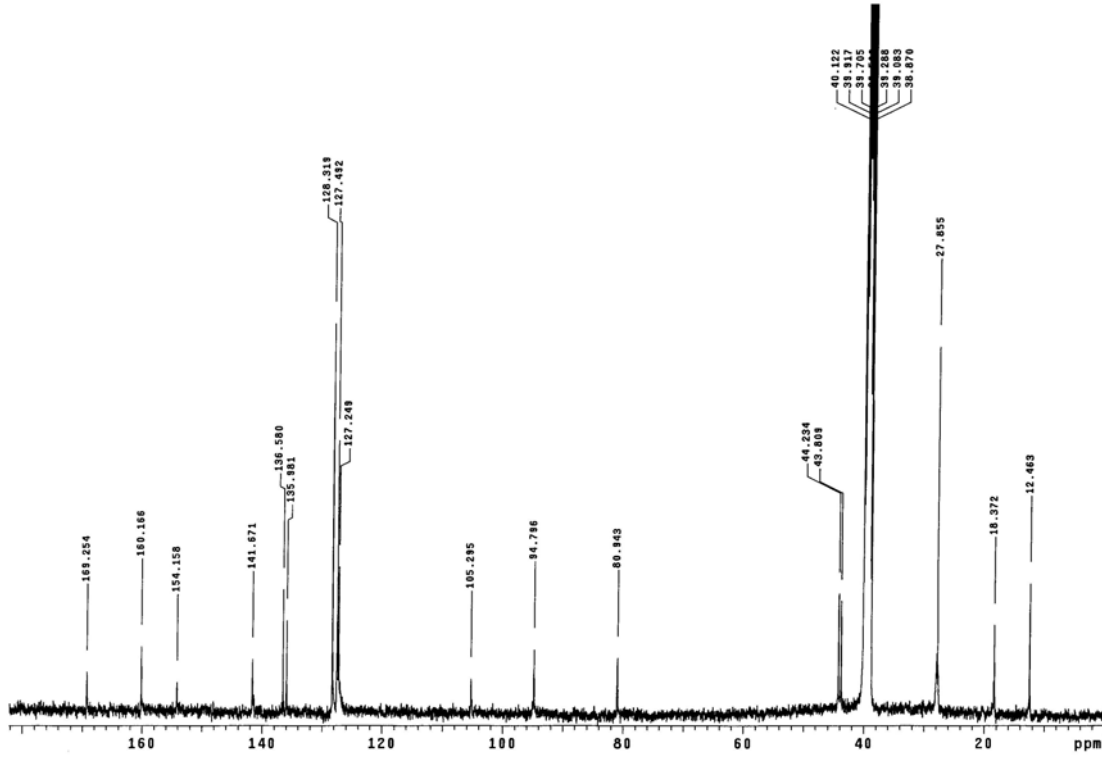

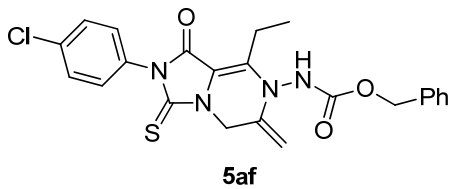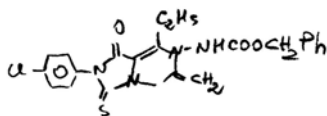

5af

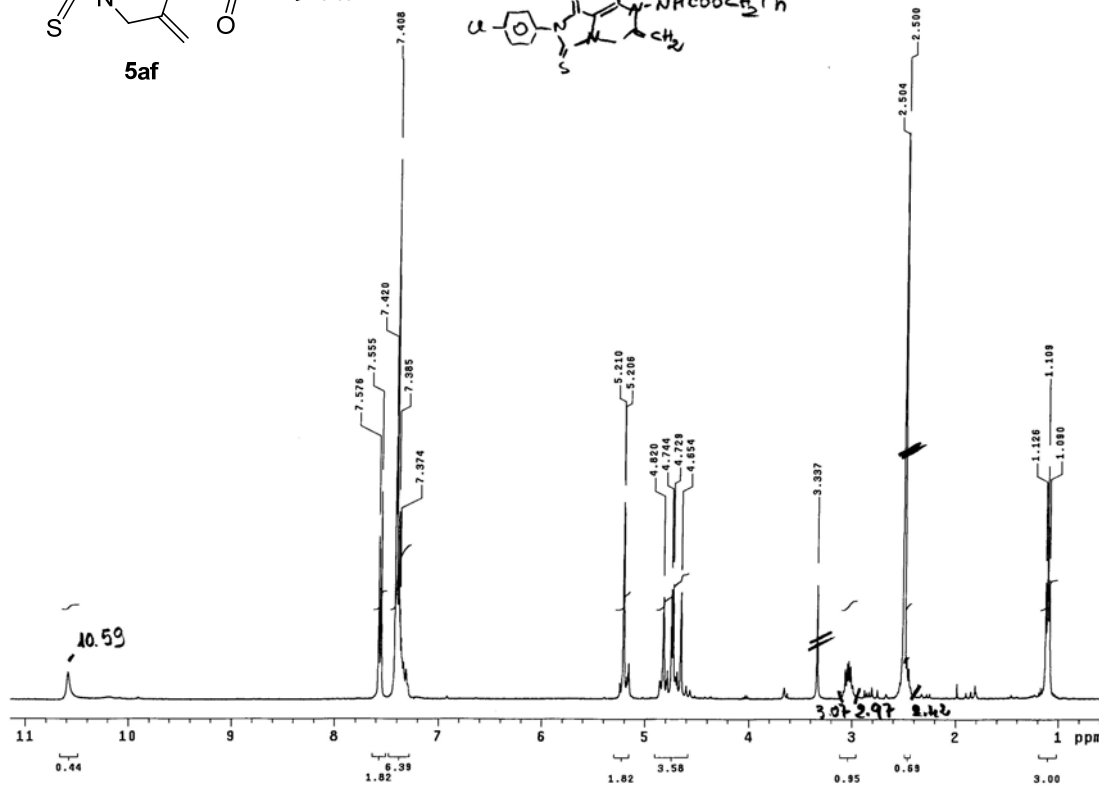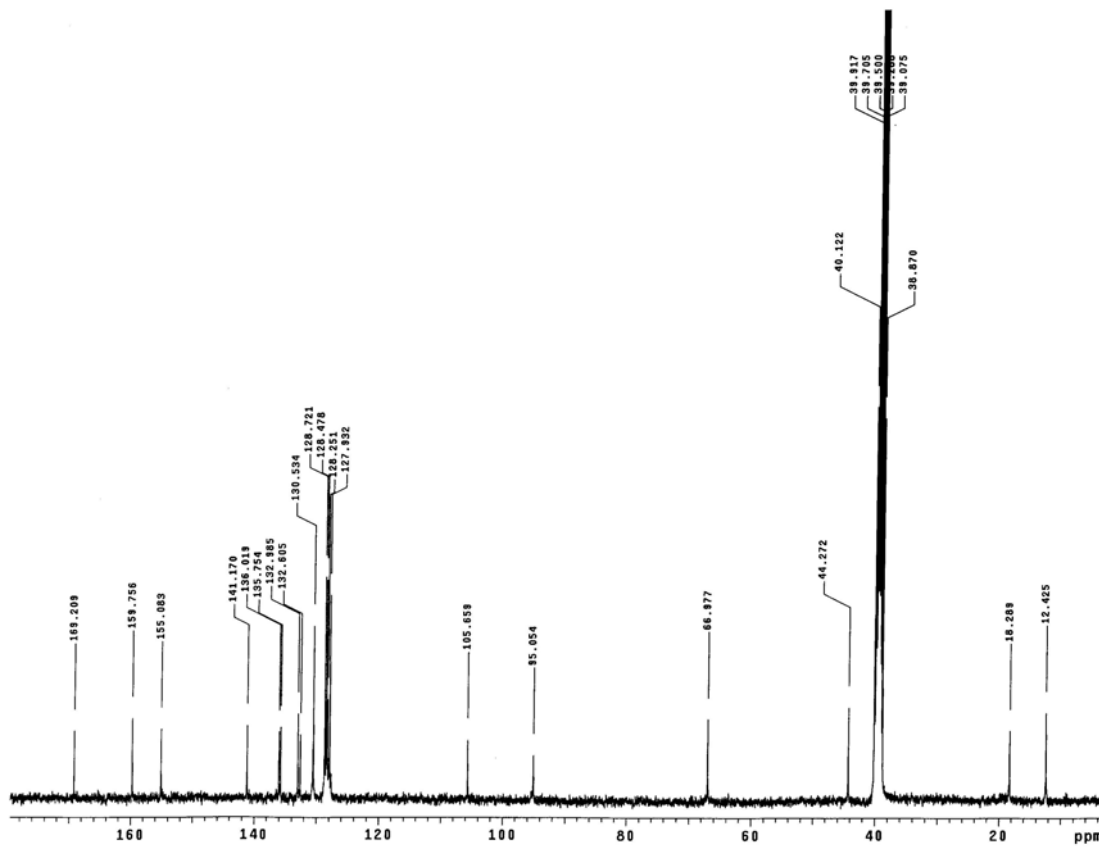

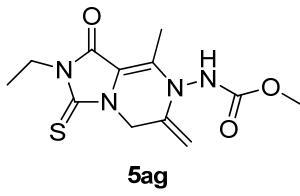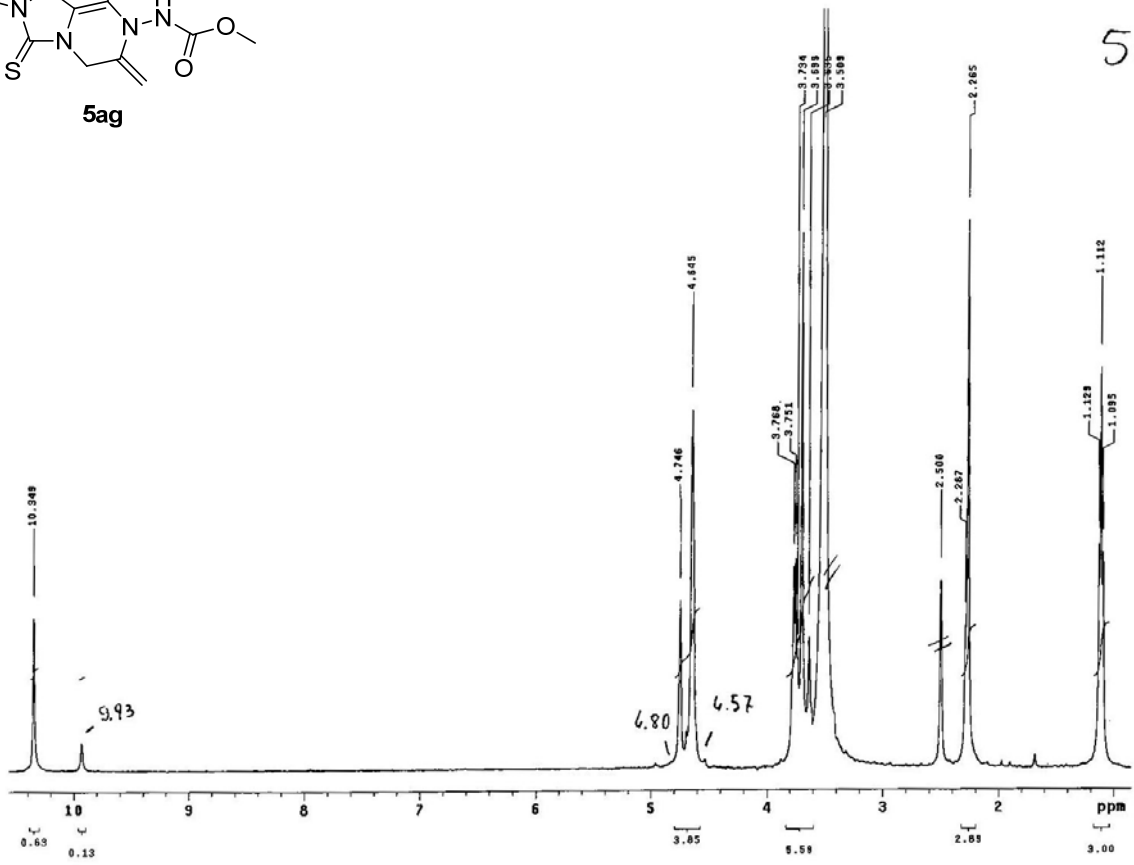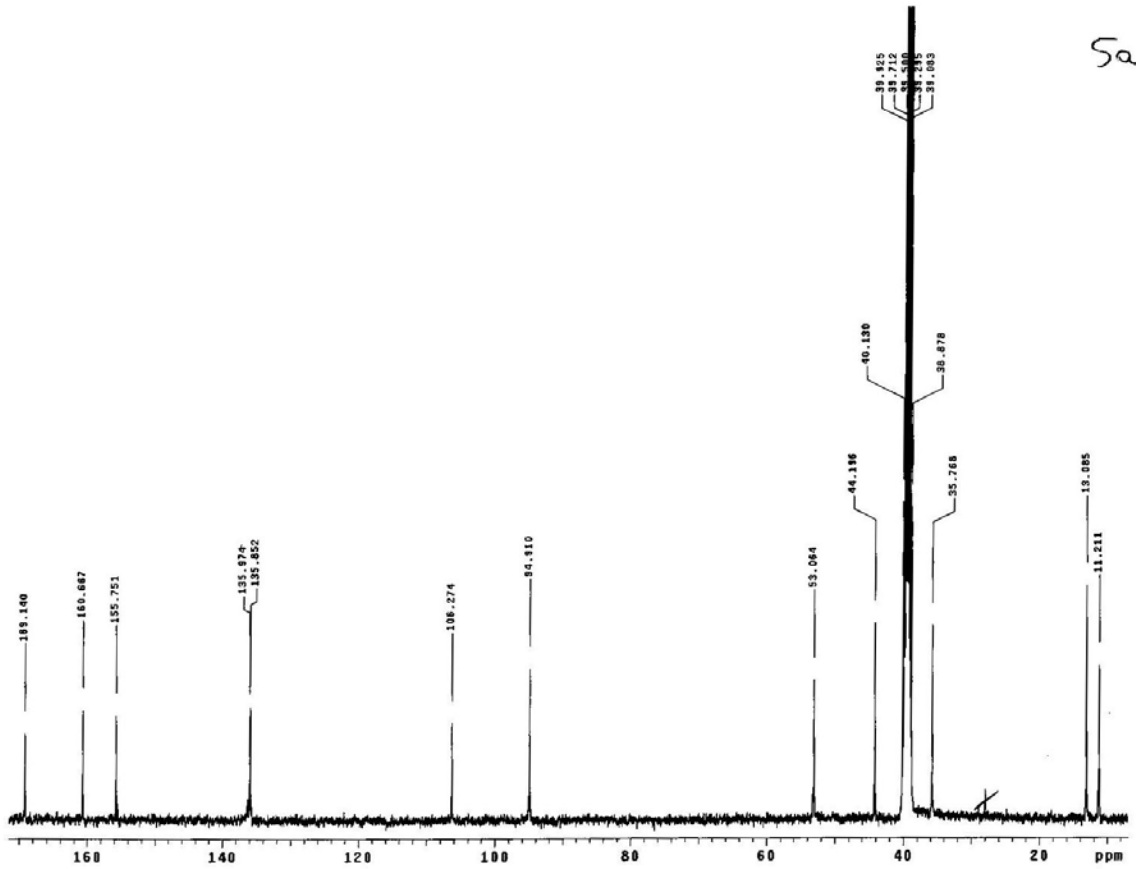



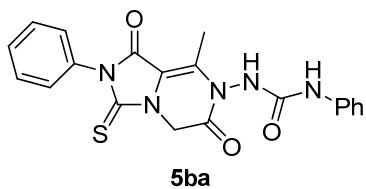

5ba

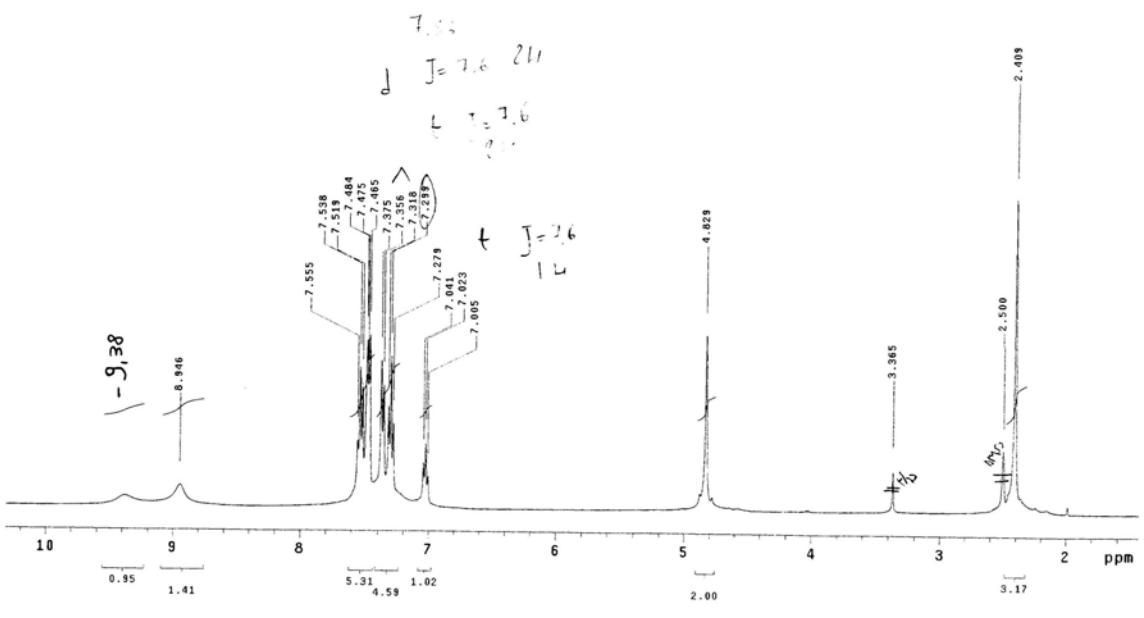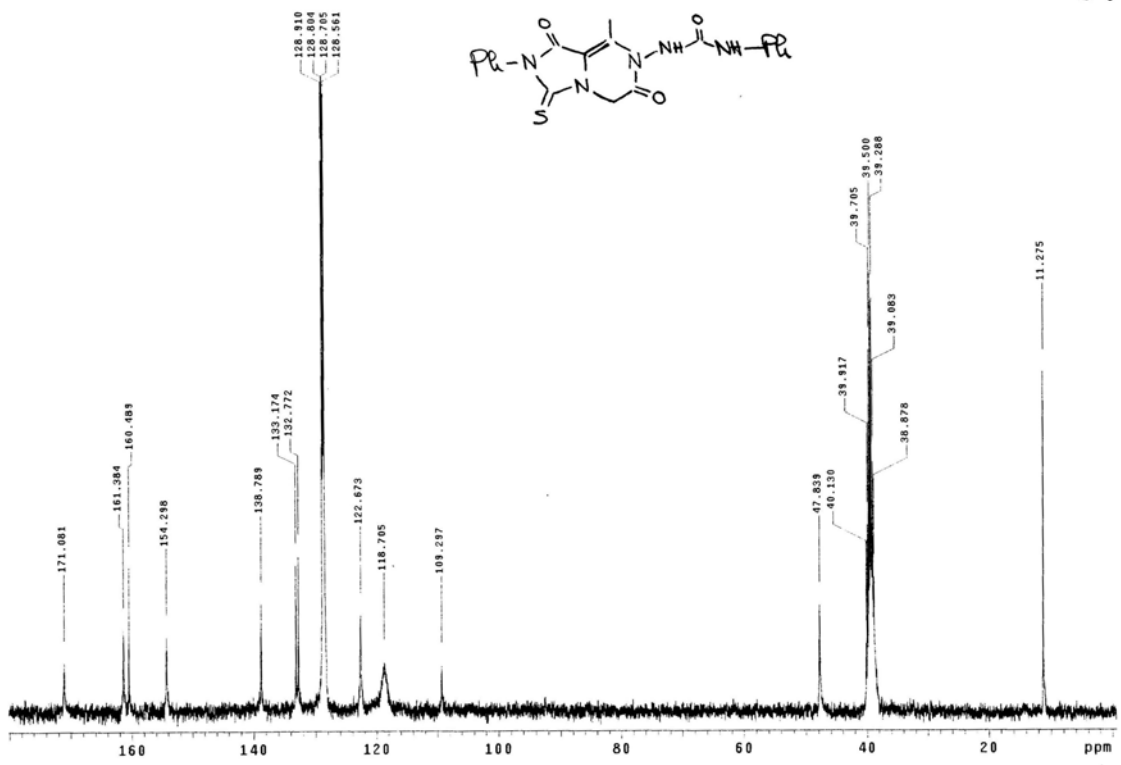

5ba

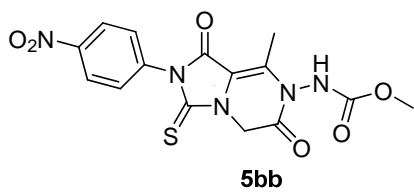

5bb

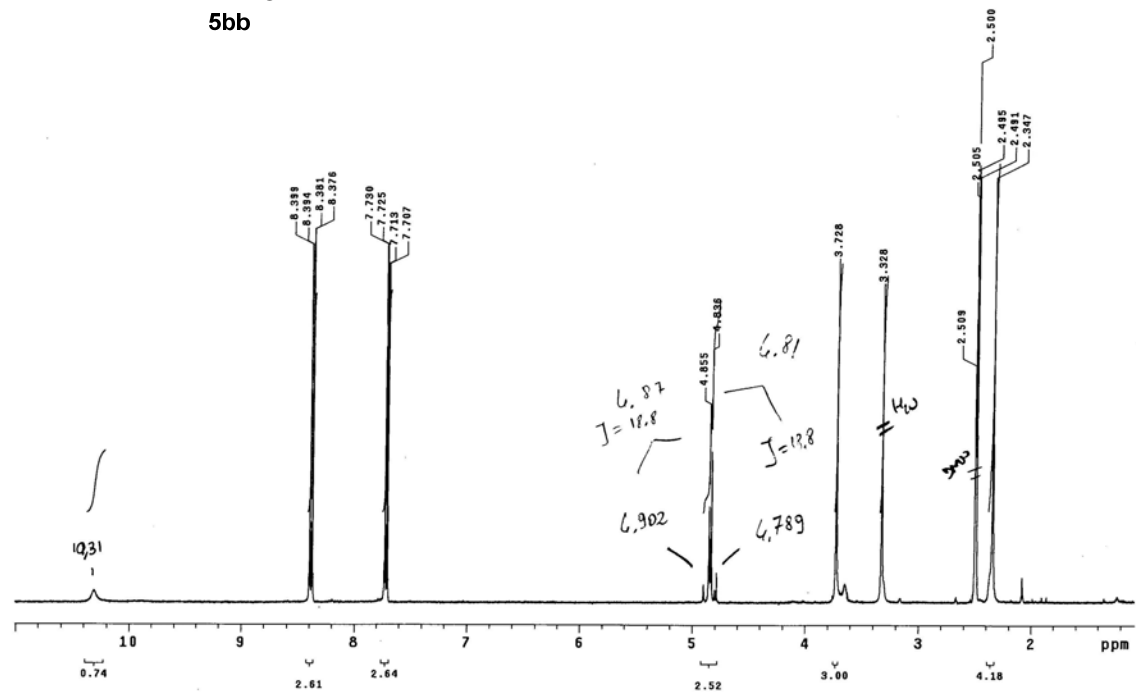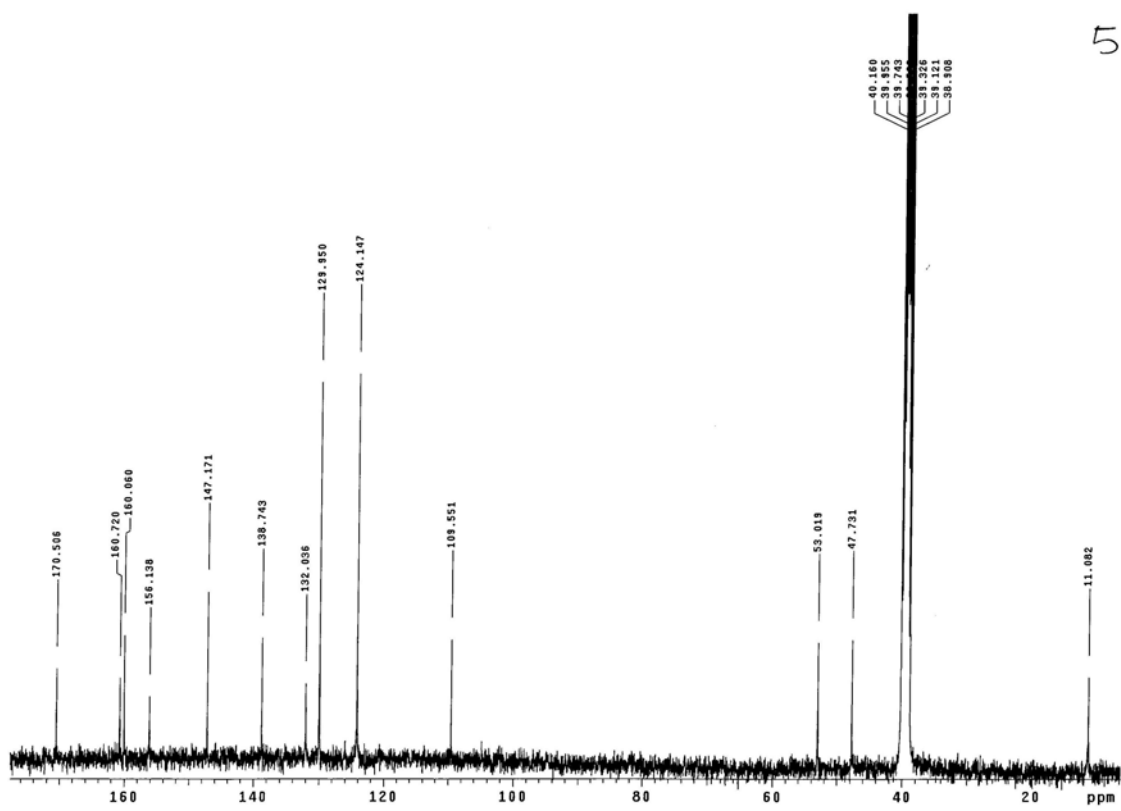

5bb

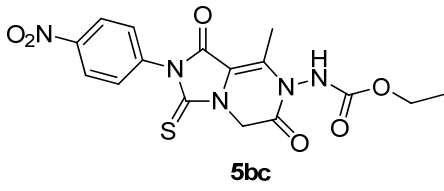

5bc

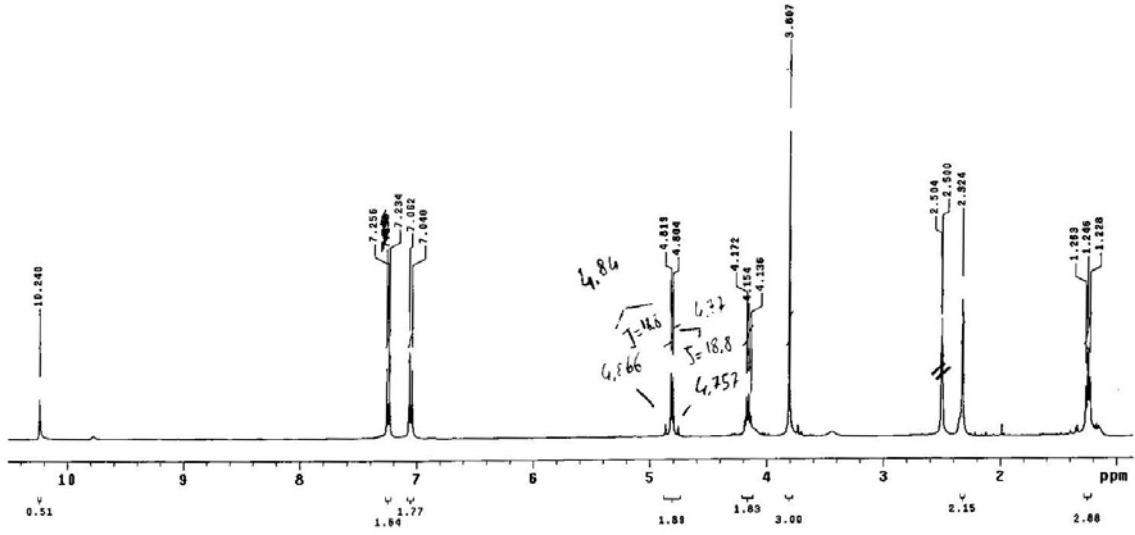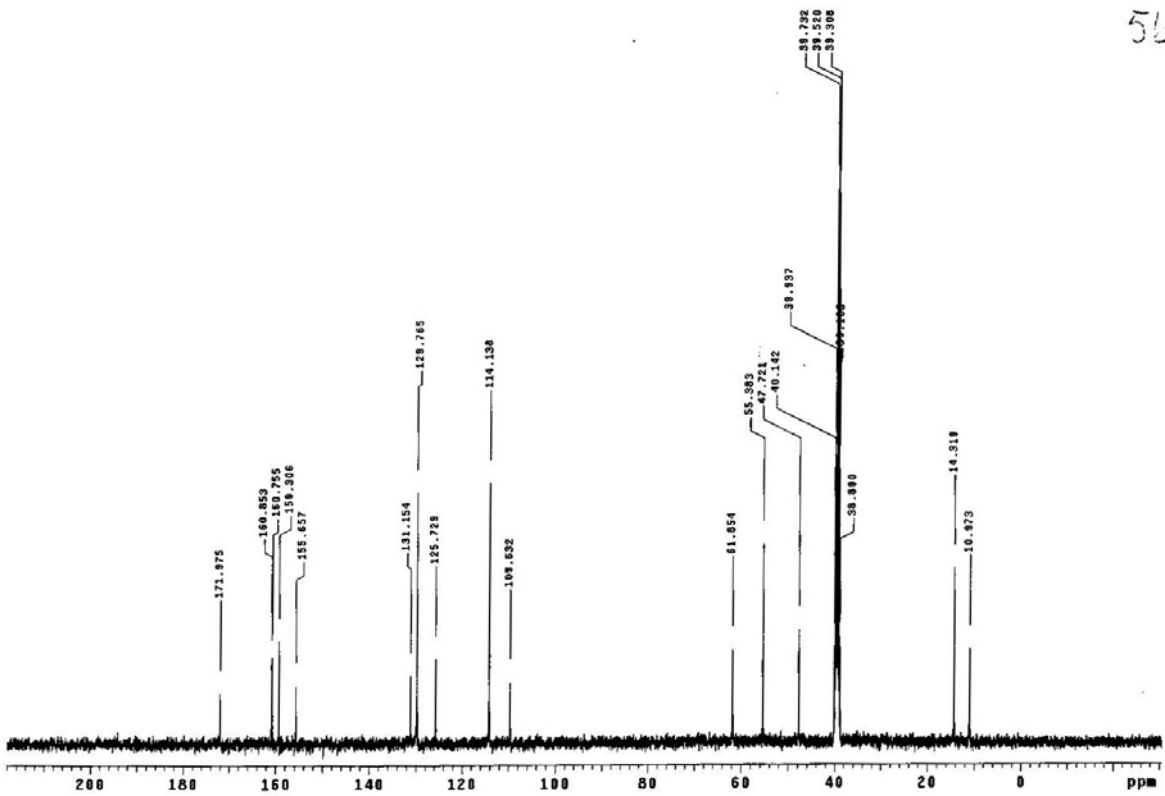

5bc

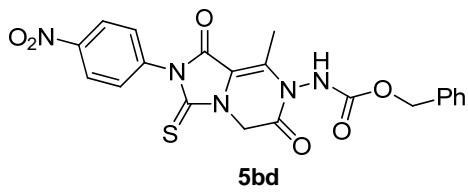

5bd

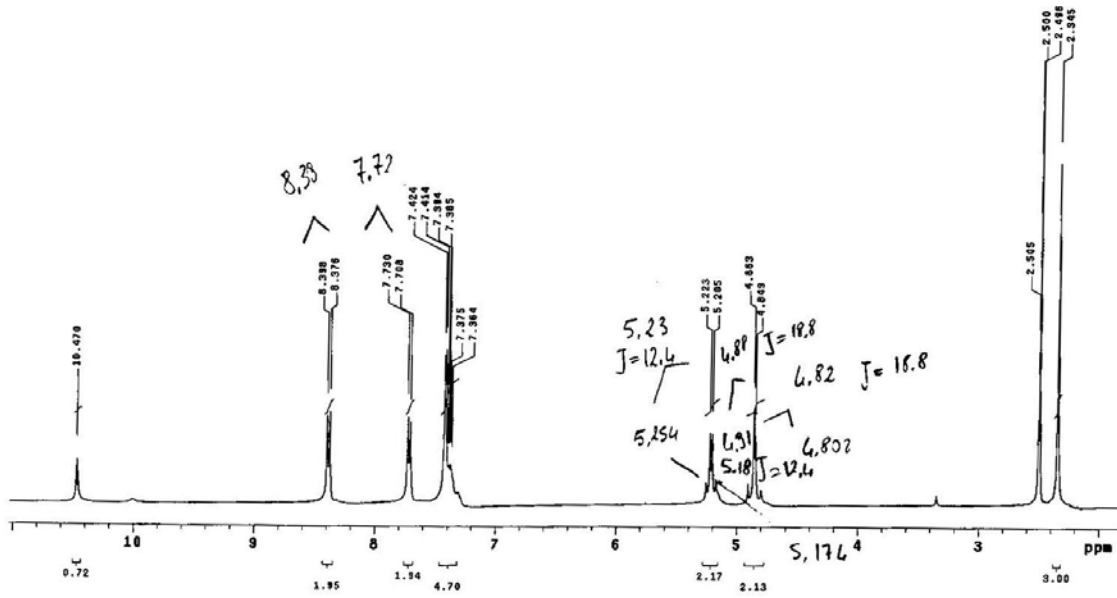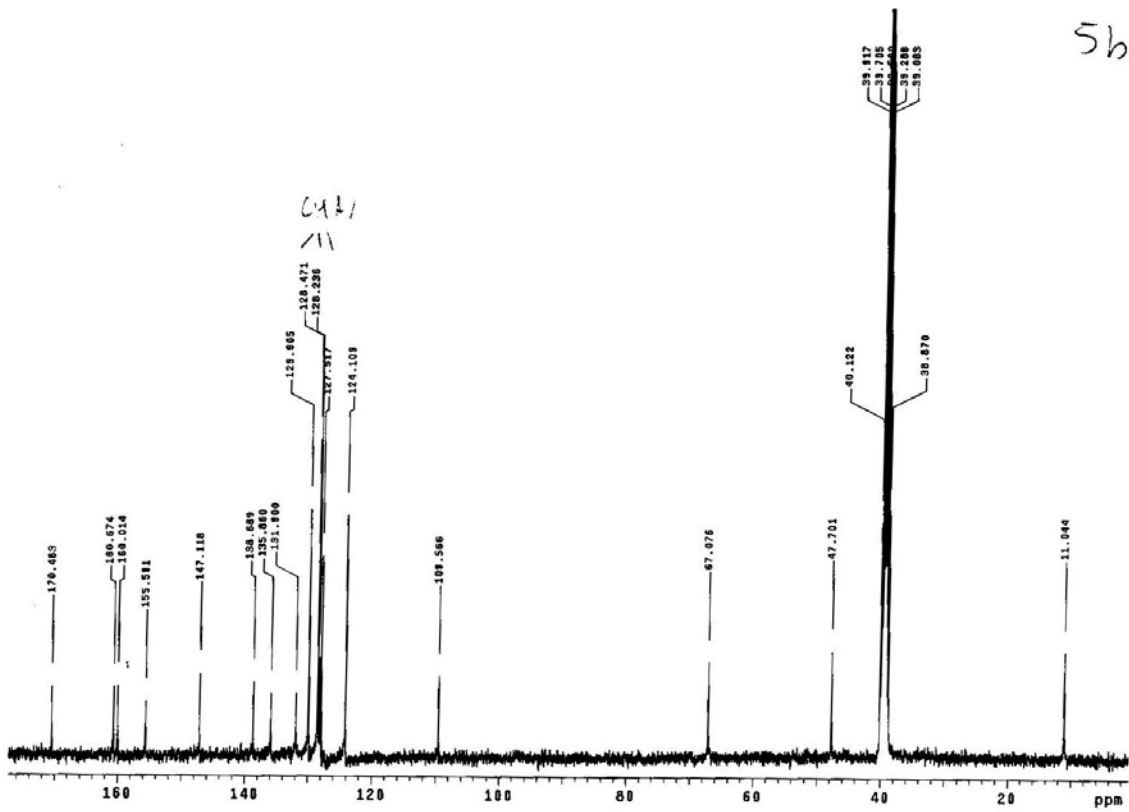

5bd

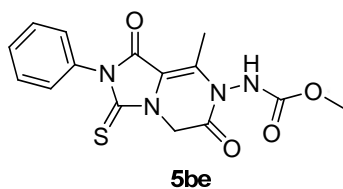

5be

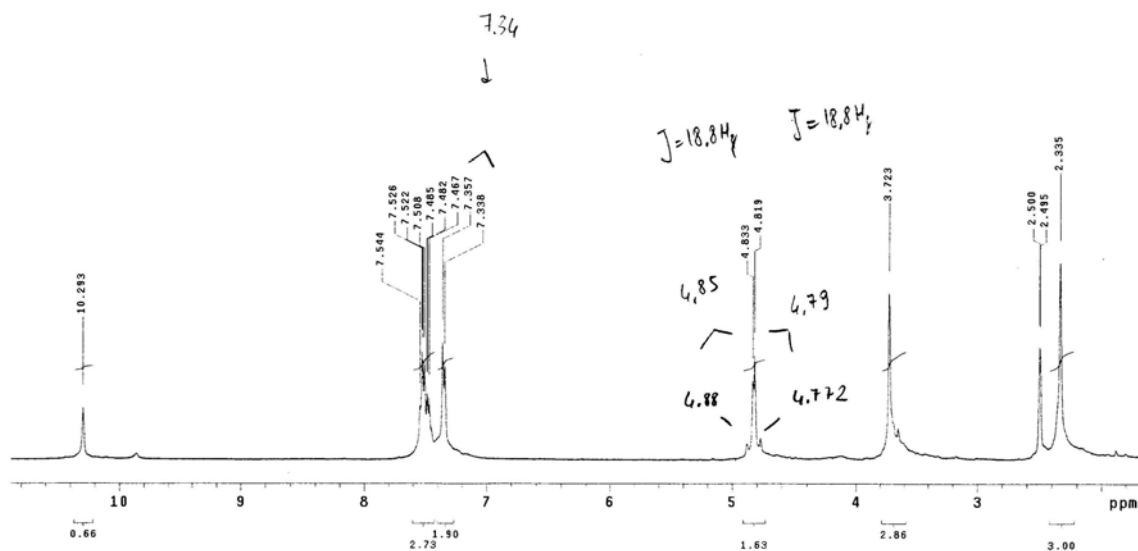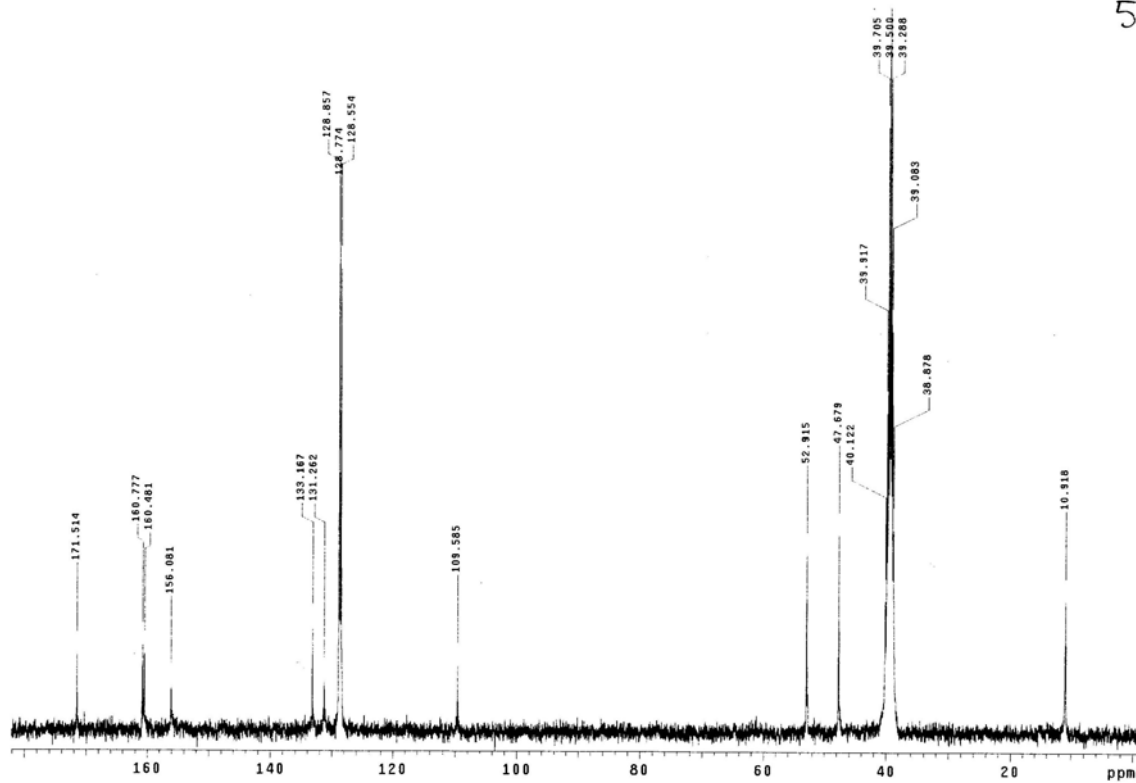

5be

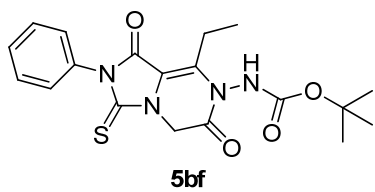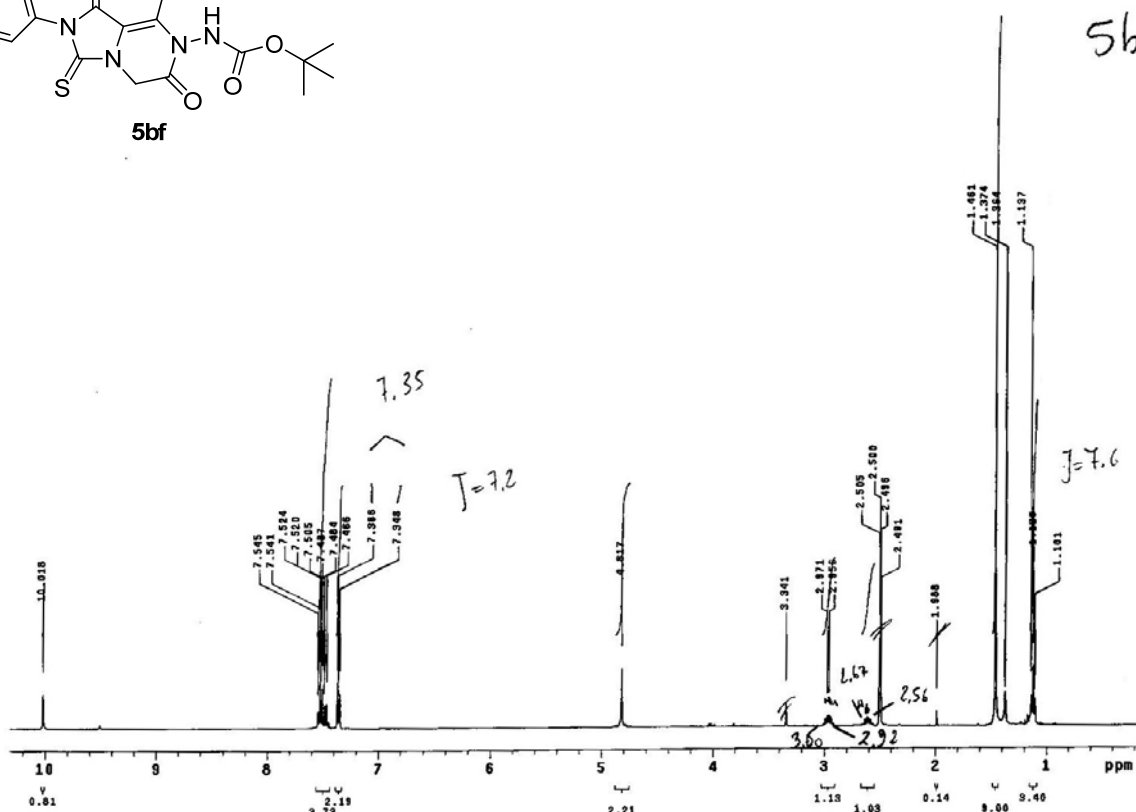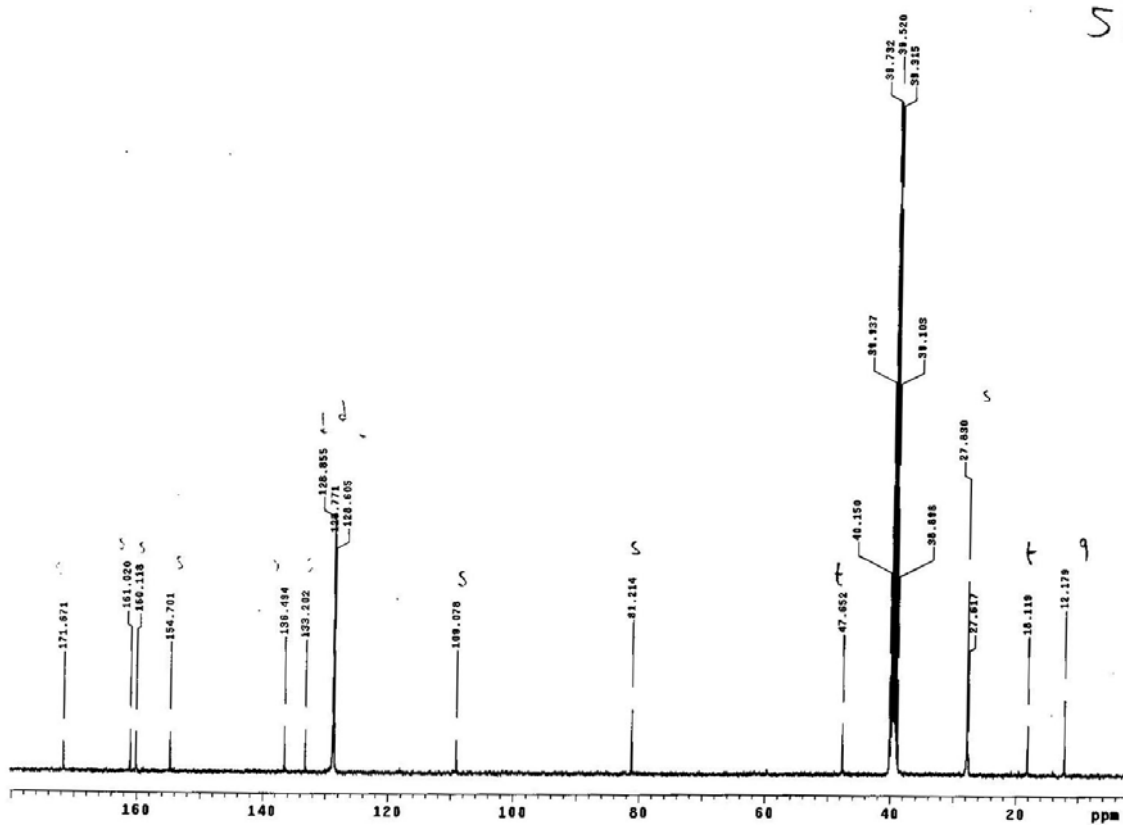

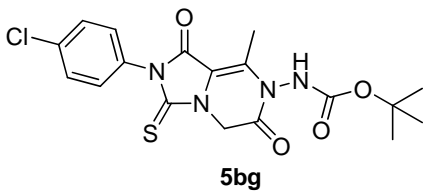

5bg

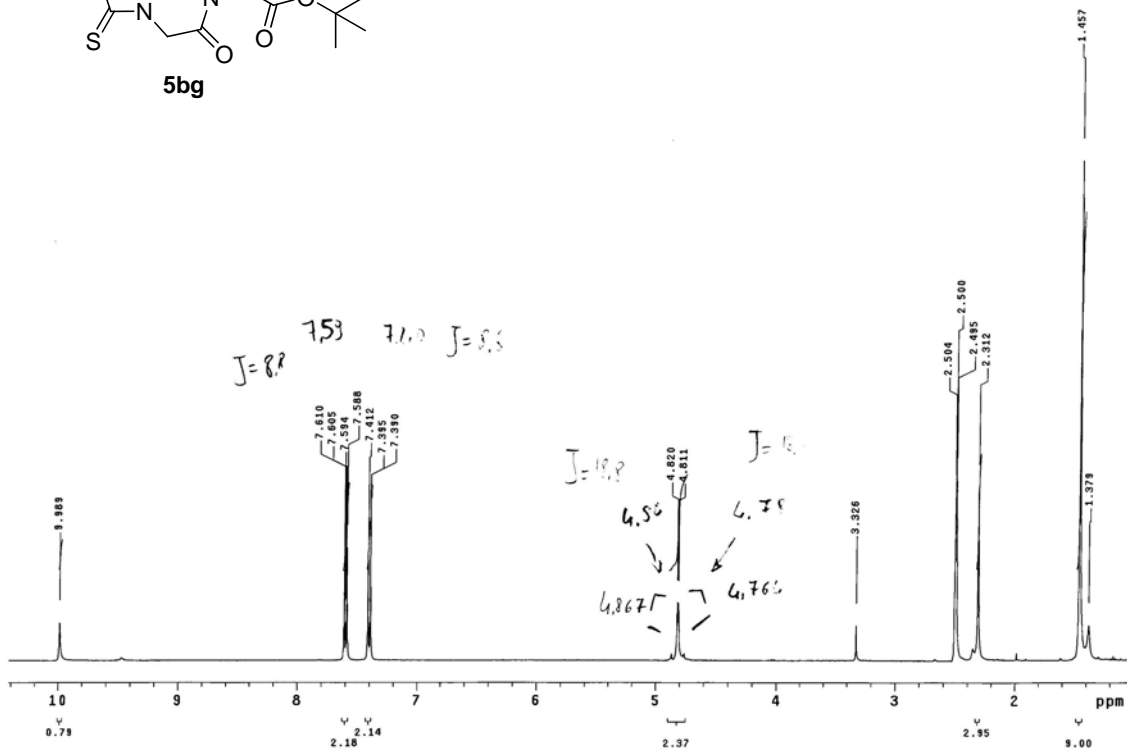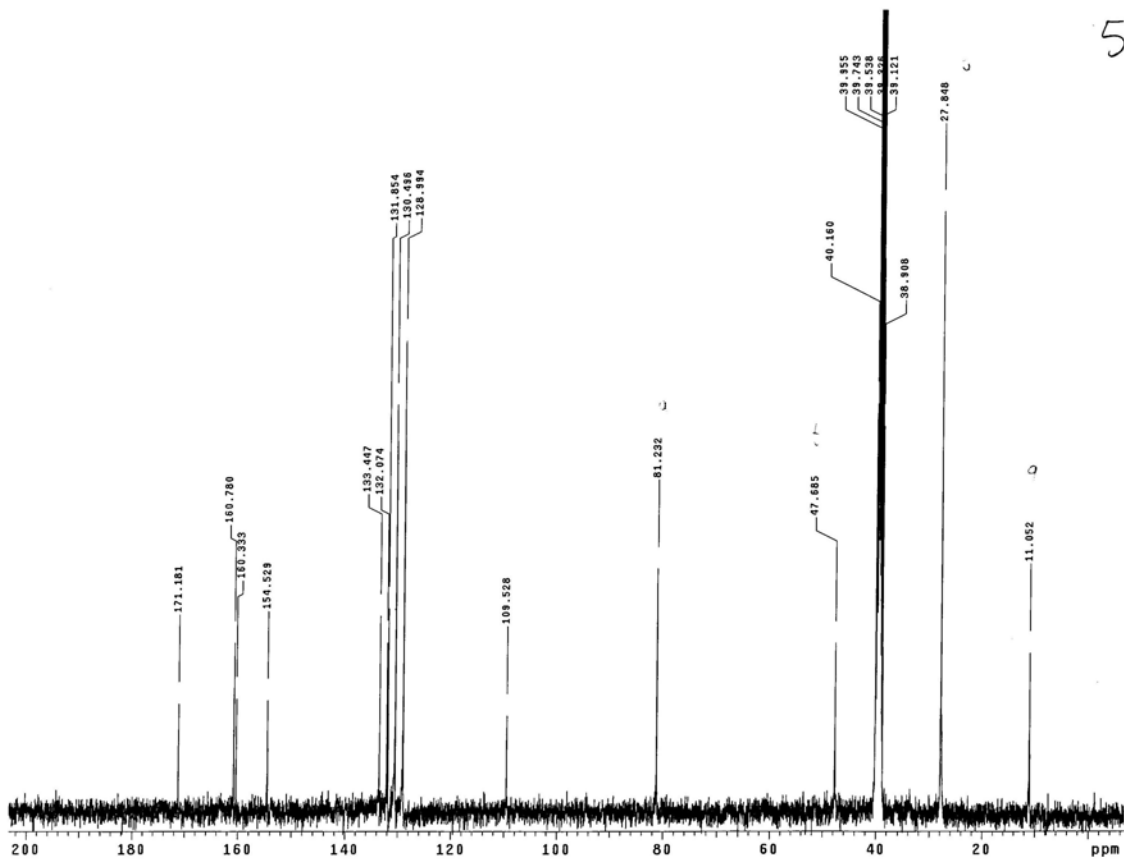

5bg

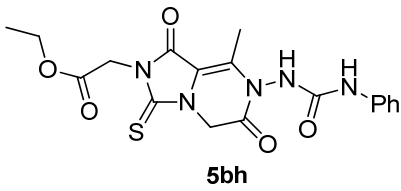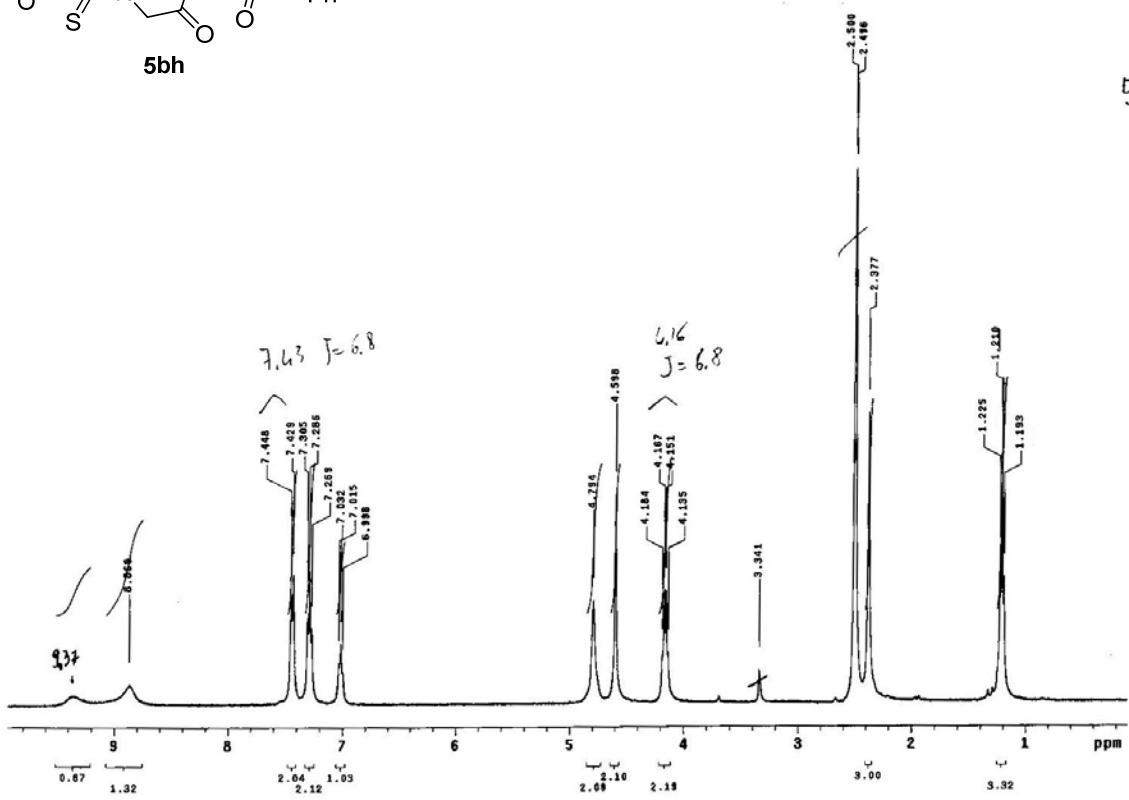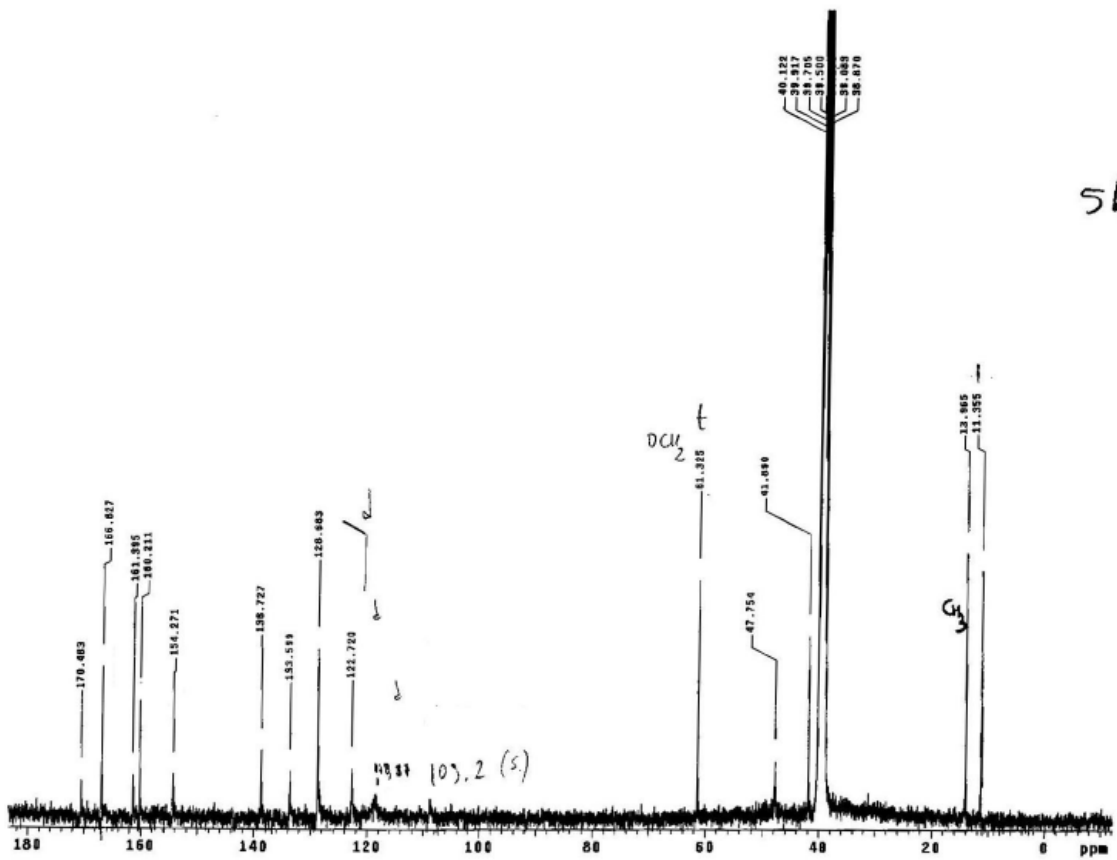



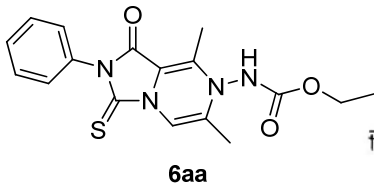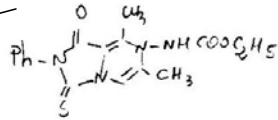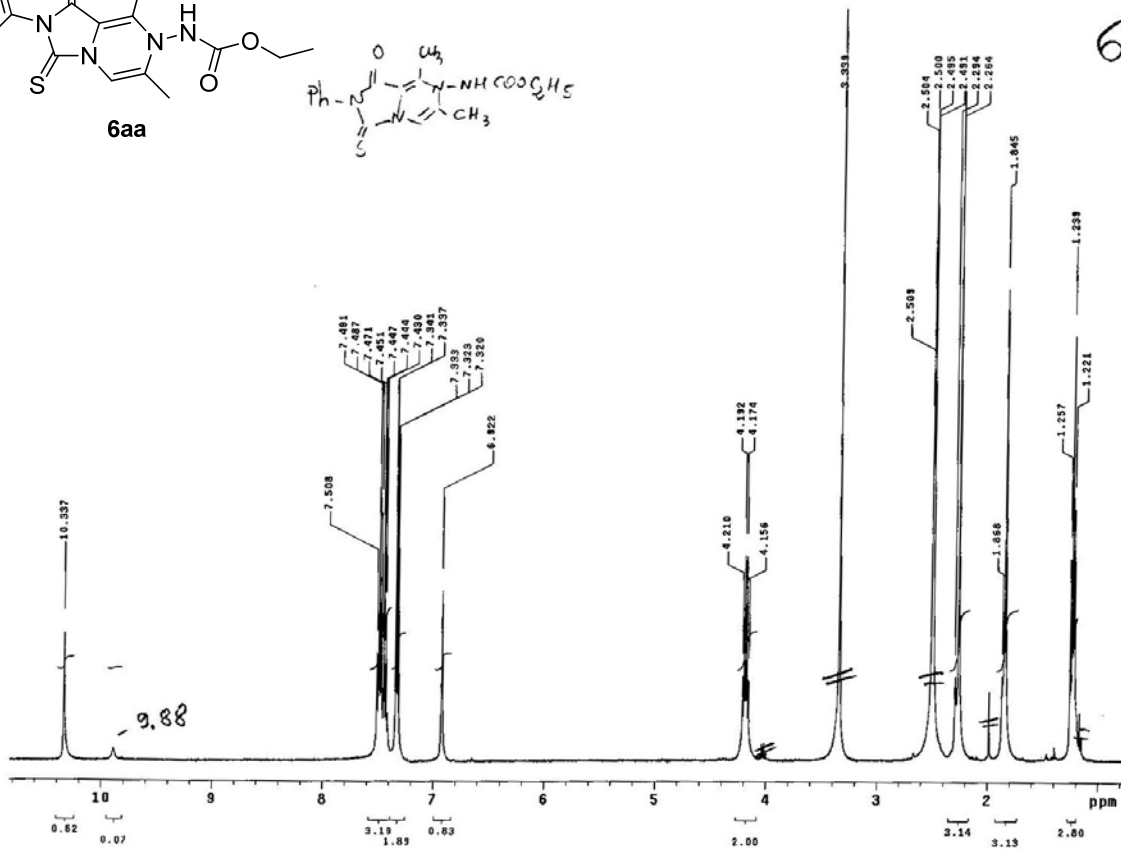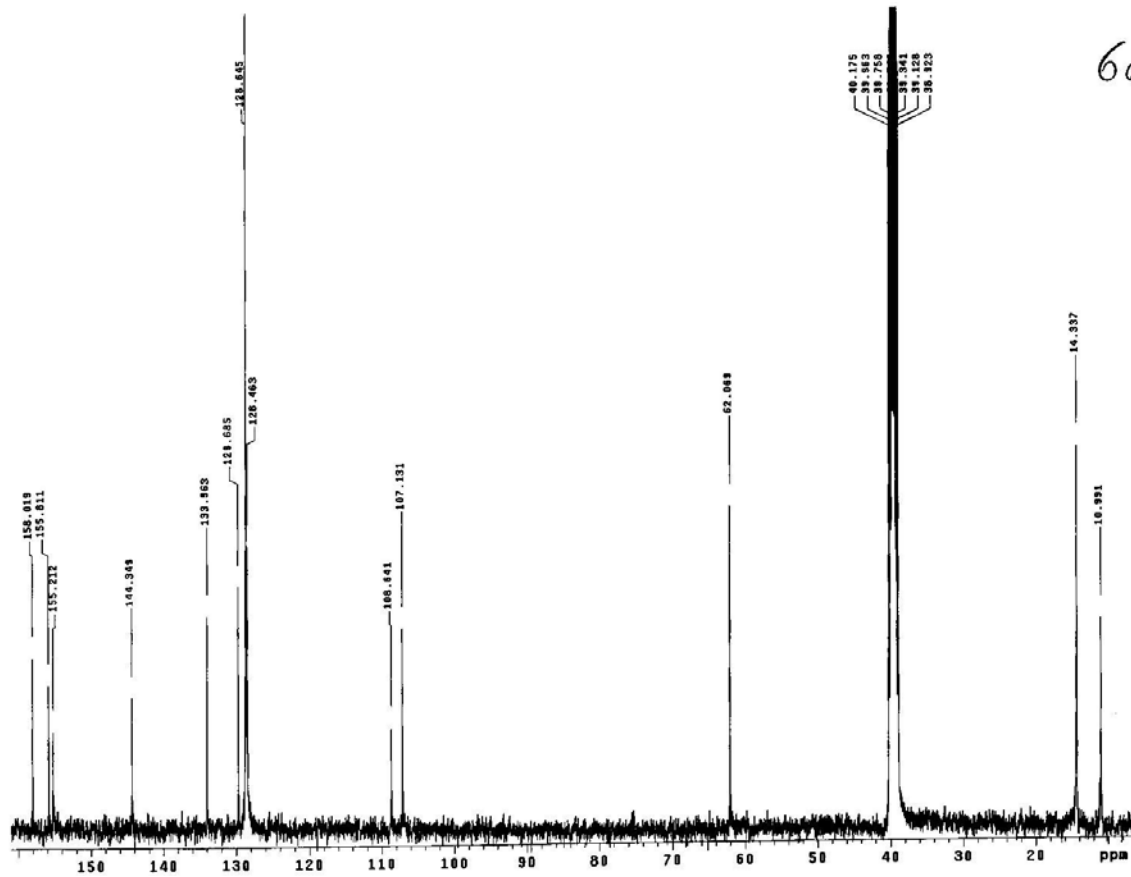

Supplement: c4ob00676c1.pdf [file c4ob00676c1.pdf]
